# Supplementary material
Source: PubMed Central journal article supplement (PMC5739012)
Supplement: ismej2017156x2.pdf [file ismej2017156x2.pdf]

## Supplementary Information for Neuenschwander et al.

### Supplementary text

*Additional genomic features of 'Ca. Nanopelagicales'*

*Description of the proposed 'Candidatus' taxa*

*Additional references*

**Figure S1:** Microphotographs and cell volumes ( $\mu\text{m}^3$ ) of isolates. The scale bar at the bottom left applies to all pictures.

**Figure S2:** Phylogenetic positioning of 'Ca. Nanopelagicales' based on 16S rRNA genes. a, bootstrapped maximum likelihood tree of 16S rRNA genes; '*Ca. Aquiluna* sp.' and *Rhodoluna lacicola* were used as outgroup. Bootstrap values are shown on the nodes. b, 16S rRNA gene sequence similarity matrix. Species borders are marked with solid lines, genus borders with dashed lines. An asterisk indicates the positioning of the described mixed culture '*Ca. P. limnetica*'.

**Figure S3:** Average nucleotide identity (ANI) matrix of 'Ca. Nanopelagicales'. Species borders are marked with solid lines, genus borders with dashed lines.

**Figure S4:** a, Average amino acid identity (AAI) matrix of 'Ca. Nanopelagicales'. b, Protein similarity (>50% identity, >50% coverage) matrix of 'Ca. Nanopelagicales'. Species borders are marked with solid lines, genus borders with dashed lines.

**Figure S5:** Phylogenomic tree with complete genomes of 'Ca. Nanopelagicales' only. 462 concatenated conserved proteins were used to generate a maximum-likelihood phylogenetic tree. The genomes of '*Ca. Aquiluna* sp.' and *Rhodoluna lacicola* were used as outgroup. Bootstrap values are indicated by black, grey, and white circles on the nodes, and a colour key is shown on the left.

**Figure S6:** Phylogenomic tree with complete genomes of the phylum Actinobacteria. Forty-eight concatenated conserved proteins were used to generate a maximum-likelihood phylogenetic tree. The genomes of *Staphylococcus aureus* and *Listeria monocytogenes* were used as outgroup. Bootstrap values are indicated by black, grey or white circles on the nodes, and a colour key is shown on the left. The proposed novel order 'Ca. Nanopelagicales' is highlighted in green.

**Figure S7:** Genome streamlining in 'Ca. Nanopelagicales'. Number of predicted CDS, number of predicted sigma factor homologs, median size of intergenic spacers, and coding density versus genome size for all complete published genomes of Actinobacteria (n=610; data taken from RefSeq). 'Ca. Nanopelagicales' and *Rhodoluna lacicola* are marked in different colours.

**Figure S8:** Bootstrapped phylogenetic tree of rhodopsin protein sequences of 'Ca. Nanopelagicales' and other Actinobacteria. Xanthorhodopsin sequences of *Salinibacter ruber* and *Thermus aquaticus* were used as outgroup. Bootstrap values are indicated by coloured circles on the nodes, and a colour key is shown on the left.

**Figure S9:** Bootstrapped maximum likelihood tree of 23S rRNA genes of ‘*Ca. Nanopelagicales*’. Target hits for the newly designed probes Pver-23S-1420 and Npel-23S-2669 are shown in brackets. ‘*Ca. Aquiluna* sp.’ and *Rhodoluna laticola* were used as outgroup. Bootstrap values are shown on the nodes.

**Figure S10:** Physico-chemical data from Lake Zurich.

**Figure S11:** Redundancy analysis of environmental parameters explaining the variability in cell numbers of microbes affiliated to all ‘*Ca. Nanopelagicales*’, ‘*Ca. Nanopelagicus*’, and ‘*Ca. P. vernalis*’ in Lake Zurich. temp, water temperature; picocyano, abundance of picocyanobacteria; irradi, irradiation; chloro, chlorophyll *a* associated with chlorophytes; diatom, chlorophyll *a* associated with diatoms; NH<sub>4</sub>, ammonium concentrations; O<sub>2</sub>, oxygen concentrations; PO<sub>4</sub>, phosphate concentrations; NO<sub>3</sub>, nitrate concentrations; depth, sampling depth.

**Figure S12:** Metagenomic fragment recruitment of ‘*Ca. Nanopelagicus*’ (a) and ‘*Ca. Planktophila*’ (b) across diverse freshwater ecosystems (see Table S7 for details).

**Figure S13:** Recruitment plots of time-series metagenomes from Lake Mendota, USA.

**Figure S14:** Whole-genome alignment of all 13 ‘*Ca. Planktophila*’ strains. The genomes have been linearized for simplicity and are arranged in the same order as in the phylogenomic tree in Fig. 1b. Synteny and different degrees of sequence similarity are indicated by vertical lines connecting the genomes.

**Figure S15:** Whole-genome alignment of the three ‘*Ca. Nanopelagicus*’ strains. The genomes have been linearized for simplicity and are arranged in the same order as in the phylogenomic tree in Fig. 1b. Synteny and different degrees of sequence similarity are indicated by vertical lines connecting the genomes. rRNA operons in the individual genomes are displayed as red arrows and tRNAs as short vertical lines. Genomic islands (GI) have been marked in different colours and numbered (see Table S10 for genes encoded in each island). Red: genes encoding mainly cell wall biosynthesis and modifications; Yellow: genes encoding mainly membrane transport and / or carbohydrate metabolism.

**Table S1:** Details of the isolation experiments conducted in Lake Zurich, Switzerland.

**Table S2:** Preprocessing and assembly parameters.

**Table S3:** Details of the sequenced strains of planktonic ‘*Ca. Nanopelagicales*’.

**Table S4:** Cell size measurements of different strains and *in-situ* in Lake Zurich.

**Table S5:** Cell sizes and genomic details of genome-streamlined microbes.

**Table S6:** Details of the applied oligonucleotide probes.

**Table S7:** Details of the publically available metagenomes that were used for recruitment in Figs. 3, S12, S13. Metagenomes are sorted according to habitat (rivers and lakes) and latitude (separately for North America and Europe). This table is provided as Excel-file (Tables\_S7-S10.xlsx).

**Table S8:** Metabolic pathways in ‘*Ca. Nanopelagicales*’. This table is provided as Excel-file (Tables\_S7-S10.xlsx).

**Table S9:** Genomic islands in 11 '*Ca. Planktophila sp.*' strains. Locus tags and gene annotations are listed and a general function of the genes encoded in each island is given at the left. This table is provided as Excel-file (Tables\_S7-S10.xlsx).

**Table S10:** Genomic islands in the three '*Ca. Nanopelagicus sp.*' strains. Locus tags and gene annotations are listed and a general function of the genes encoded in each island is given at the left. This table is provided as Excel-file (Tables\_S7-S10.xlsx).

## 1 Supplementary text

### 2 Additional genomic features of 'Ca. Nanopelagiales'

3 None of the strains encoded genes for flagella or chemotaxis, confirming the non-  
4 motile lifestyle of 'Ca. Nanopelagiales'. No CRISPR-Cas system was identified, and  
5 the number of signal transduction genes was low with only two two-component  
6 regulatory systems for phosphate starvation and osmotic stress response and 2-3  
7 additional histidine kinases (Table S7). Nickel superoxide dismutases involved in  
8 oxidative stress response were found in all strains, while catalase-peroxidases were  
9 present in 'Ca. Planktophila', but absent in 'Ca. Nanopelagicus'.

10 We could confirm the presence of glycolysis via the Embden-Meyerhof  
11 pathway, pentose phosphate pathway, tricarboxylic acid (TCA) cycle and oxidative  
12 phosphorylation in all genomes, as was proposed from SAGs and MAGs (Garcia *et al.*,  
13 2013, Ghai *et al.*, 2014, Ghylin *et al.*, 2014). Nevertheless, some variations  
14 between the different strains were found: 'Ca. Planktophila' strains encoded a class I  
15 fructose-bisphosphate aldolase, while the class II variant was annotated in all 'Ca.  
16 Nanopelagicus' genomes. The former is in contrast to the 'Ca. Planktophila' genomes  
17 sequenced of Kang *et al.* (2017) which all encoded the class II variant. The non-  
18 oxidative branch of the pentose phosphate pathway was detected in all genomes,  
19 whereas the oxidative branch was only present in 'Ca. P. dulcis' strains and 'Ca. P.  
20 sulfonica' MMS-IA-56. This is in agreement with previous studies in which genes  
21 involved in the oxidative branch of the pentose phosphate pathway were only  
22 detected in 'Ca. Planktophila' (i.e., *acl-A* / *acl-A1*) genomes (Ghylin *et al.*, 2014, Kang  
23 *et al.*, 2017). Pyruvate dehydrogenase E2 components, involved in the conversion of  
24 pyruvate to acetyl-CoA, were only detected in one of the 'Ca. P. versatilis' strains  
25 (MMS-IIB-142). All genomes did however contain genes coding for the 2-  
26 oxoglutarate dehydrogenase E2 component, a potential substitute for the latter,  
27 which was also the case in the four *acl* genomes described by Kang *et al.* (2017).  
28 Complete gluconeogenesis pathways were detected in 'Ca. N. limnes' and 'Ca. N.  
29 hibericus' as well as in 'Ca. P. limnetica' and 'Ca. P. vernalis', whereas in the other  
30 genomes either the first steps (pyruvate to PEP) and/or the last steps (fructose-1,6P<sub>2</sub>  
31 to  $\beta$ -D-fructose-6P) were missing. Key enzymes involved in gluconeogenesis have  
32 previously been detected in *acl-A7*, *acl-C1* and *acl-B1* genomes (Kang *et al.*, 2017,  
33 Ghylin *et al.*, 2014) but not in other *ac1-A1* genomes. The presence of carbonic  
34 anhydrases and PEP carboxylases in all genomes suggests the ability to replenish  
35 precursors needed for growth by anapleurotic CO<sub>2</sub> fixation. Previous studies  
36 indicated a facultative aerobic lifestyle based on the presence of pathways for  
37 pyruvate fermentation (Garcia *et al.*, 2013, Ghai *et al.*, 2014, Ghylin *et al.*, 2014) We  
38 cannot confirm this for our genomes. However, all our strains were isolated from 5 m  
39 depth from Lake Zurich, where oxic conditions prevail. Oxidative phosphorylation  
40 pathways were present in all genomes with the anomaly of missing succinate  
41 dehydrogenase subunits SDHC and SDHD as previously described by Kang *et al.*,  
42 (2017).

43 Exopolyphosphatases, high affinity membrane transporters for inorganic  
44 phosphate uptake (Pst system), inorganic pyrophosphatases, and two-component  
45 regulatory systems for phosphate stress were annotated for all strains, in agreement  
46 with predictions from SAGs (Ghylin *et al.*, 2014) and MAGs (Ghai *et al.*, 2014).  
47 Phosphorus is usually the limiting element in freshwater systems (Vadstein 2000,

48 Wetzel 2001), and it seems that 'Ca. Nanopelagiales have efficient phosphate  
49 acquisition systems, although they did not show higher *in-situ* incorporation of  
50 inorganic phosphate than other freshwater microbes (Rofner *et al.*, 2016b) and were  
51 underrepresented in dissolved organic phosphate uptake (Rofner *et al.*, 2016a). All  
52 strains encoded genes for ammonium transport (Amt family), and 'Ca. P. sulfonica',  
53 'Ca. P. versatilis' and 'Ca. P. lacus' strains had two copies. Transporters for other N-  
54 rich components like polyamines (i.e., spermidine/putrescine) and amino acids as  
55 well as cyanophycinases were predicted for all strains and cyanate transporters were  
56 present in 'Ca. P. versatilis' and 'Ca. P. vernalis'. This high prevalence of genes  
57 involved in the uptake of organic N-rich compounds appears to be a key  
58 characteristic for 'Ca. Nanopelagiales' (Garcia *et al.*, 2013; Ghai *et al.*, 2014; Kang  
59 *et al.*, 2017). A high *in-situ* uptake of different amino acids was previously reported  
60 from MAR-FISH assays, as well as high glucose incorporation (Buck *et al.*, 2009,  
61 Pérez *et al.*, 2015, Salcher *et al.*, 2010, Salcher *et al.*, 2013). Polyamine degradation  
62 pathways were present in all genomes, however, not complete. With the exception of  
63 'Ca. P. sulfonica' all strains were able to convert 4-aminobutyraldehyde to succinate;  
64 while enzymes catalysing the first three steps of the spermidine/putrescine  
65 degradation pathway were not annotated. Most genomes, however, contained  
66 acetyloronithine aminotransferases which belong to the same superfamily as  
67 putrescine aminotransferases, and thus, might fulfil this function. Lysozymes were  
68 predicted in all genomes, as well as putative chitinases (GH18 family, glycoside  
69 hydrolase CAZy; (Garcia *et al.*, 2013)) that include signal sequences for membrane  
70 transport, consistent with SAGs (Ghylin *et al.*, 2014). Their low homology to  
71 chitinases originating from other than acl SAGs or MAGs, however, makes  
72 interpretation difficult, particularly since genes involved in amino-sugar degradation  
73 were only detected in 'Ca. P. dulcis' and 'Ca. P. sulfonica'. We could also not identify  
74 transporters for amino sugars although 'Ca. Nanopelagiales' are known to take up  
75 N-acetylglucosamine *in situ* (Beier and Bertilsson 2011, Eckert *et al.*, 2012). Other  
76 transporters, especially for carbohydrates, as well as genes encoding carbohydrate  
77 breakdown, were present in a highly variable fashion in the genomes: 'Ca. P. dulcis'  
78 and 'Ca. P. vernalis' strains had the highest number of different carbohydrate  
79 transporters and enzymes involved in carbohydrate metabolism, while 'Ca.  
80 Nanopelagicus' strains and 'Ca. P. limnetica' were less versatile in carbohydrate  
81 usage (Tables 2, S7). Membrane transporters for sulfonate and benzoate were  
82 annotated in two strains only ('Ca. P. sulfonica' and 'Ca. P. limnetica', respectively).  
83 Transporters for biotin (*bioY*) and energy-coupling factor transporters with preceding  
84 AdoCbl riboswitches for cobalamin were annotated in all 'Ca. Planktophila' strains  
85 except for 'Ca. P. limnetica'. Although transporters for thiamine and riboflavin were  
86 not found, additional NAD transporters (*pnuC*) preceded by riboswitches for thiamine  
87 and/or riboflavin were annotated in all 'Ca. Nanopelagicus'. This is in accordance  
88 with other genomes associated with 'Ca. Nanopelagiales' (Kang *et al.*, 2017). As  
89 Pnu transporters share high homologies to each other, it is likely that the putative  
90 PnuC either function as thiamine (PnuT) or riboflavin (PnuX) transporters (Jaehme  
91 and Slotboom Dirk 2015).

## 92 **Description of the proposed 'Candidatus' taxa**

93 Based on our analysis we suggest that our strains represent a novel 'Candidatus'  
94 order and 'Candidatus' family in the phylum Actinobacteria with two new genera and  
95 nine new species.

96 'Candidatus Nanopelagicales' [Na.no.pe.la.gi.ca'les. N.L. masc. n.  
97 *Nanopelagicus* type genus of the order; suff. *-ales*, ending to denote an order; N.L.  
98 fem. pl. n. *Nanopelagicales*, the order of the genus *Nanopelagicus*]. Aerobic  
99 chemoheterotrophs. Cells are tiny, non-motile, and inhabit the plankton of  
100 freshwaters. 'Ca. Nanopelagicales' can be recognized by the presence of the  
101 diagnostic oligonucleotide sequence 5'-AATGCGTTAGCTGCGTCGCA-3' in the 16S  
102 rRNA gene (positions 852-872, *E. coli* numbering). A member of the phylum  
103 Actinobacteria. Contains a single family, 'Candidatus Nanopelagicus', and two  
104 genera 'Candidatus Nanopelagicus' and 'Candidatus Planktophila'. Basis of the  
105 assignment is a phylogenetic tree of 48 conserved concatenated proteins of >100  
106 complete genomes of all orders of Actinobacteria (Fig. 2, S6).

107 'Candidatus Nanopelagicaceae' [Na.no.pe.la.gi.ca.ce'ae. N.L. masc. n.  
108 *Nanopelagicus* type genus of the family; suff. *-aceae*, ending to denote a family; N.L.  
109 fem. pl. n. *Nanopelagicaceae*, the order of genus *Nanopelagicus*.]

110 'Candidatus Nanopelagicus limnes' [Na.no.pe.la.gi.cus. N.L. masc. n. *nano* very  
111 small; L. masc. adj. *pelagicus* belonging to the pelagial; N.L. masc. n. *Nanopelagicus*  
112 very small pelagic; referring to the small cell and genome size and the pelagic  
113 habitat; lim'nes. L. gen. n. *limnes* of a lake]. Represented by strain MMS-21-122,  
114 which was isolated from Lake Zurich, Switzerland. Curved rods with lengths of  
115  $0.45\pm 0.09$   $\mu\text{m}$  and diameters of  $0.25\pm 0.03$   $\mu\text{m}$  (Table S3, Figure S1). The initial pure  
116 culture was lost after a few propagations to fresh medium; no growing culture is  
117 available. The initial culture grew well in sterile lake water amended with minimal  
118 carbon medium, vitamins and amino acids. 'Ca. N. limnes' MMS-21-122 has a  
119 genome size of 1.24 Mbp and a genomic GC content of 41.5 %. It is auxotrophic for  
120 reduced sulfur sources, several amino acids (proline, ornithine, histidine, betaine)  
121 and several vitamins (B1, B2, B5, B7, B12) and possesses rhodopsins (Table S7).  
122 Members of the genus 'Ca. N. abundans' can be recognized by the presence of the  
123 diagnostic oligonucleotide sequence 5'-ACAAGAGGTTTCGTCCGTCC-3' in the 23S  
124 rRNA gene (positions 2669-2688, *E. coli* numbering). A complete genome of 'Ca. N.  
125 limnes' MMS-21-122 is available at Genbank (CP016768). Phylogenetic analyses of  
126 476 concatenated protein sequences, 16S rRNA, 23S rRNA, and rhodopsin  
127 genes, as well as average nucleotide identities and protein similarities indicated that  
128 the *Candidatus* taxon belongs to a novel genus ('Ca. Nanopelagicus') of the family  
129 'Ca. Nanopelagicaceae' and the novel order 'Ca. Nanopelagicales'.

130 'Candidatus Nanopelagicus hibericus' [hi.be'ri.cus. L. masc. adj. *hibericus*  
131 Spanish; referring to a high abundance in two Spanish reservoirs]. Represented by  
132 strain MMS-21-160, which was isolated from Lake Zurich, Switzerland. Rods with  
133 lengths of  $0.33\pm 0.07$   $\mu\text{m}$  and diameters of  $0.24\pm 0.03$   $\mu\text{m}$  (Table S3, Figure S1). The  
134 initial pure culture was lost after a few propagations to fresh medium; no growing  
135 culture is available. The initial culture grew well in sterile lake water amended with  
136 minimal carbon medium, vitamins and amino acids. 'Ca. N. hibericus' MMS-21-160  
137 has a genome size of 1.22 Mbp and a genomic GC content of 42.4 %. It is  
138 auxotrophic for reduced sulfur sources, several amino acids (ornithine, histidine,  
139 betaine) and several vitamins (B1, B2, B5, B7, B12) and possesses rhodopsins  
140 (Table S7). A complete genome is available at Genbank (CP016771). Phylogenetic  
141 analyses of 476 concatenated protein sequences, 16S rRNA, 23S rRNA, and  
142 rhodopsin genes, as well as average nucleotide identities and protein similarities  
143 indicated the affiliation of the *Candidatus* taxon to the novel genus 'Ca.

144 Nanopelagicus' of the family 'Ca. Nanopelagicaceae' and the novel order 'Ca.  
145 Nanopelagicales'.

146 'Candidatus Nanopelagicus abundans' [a.bun'dans. L. pres. part. *abundans*  
147 abundant; referring to high global abundances]. Represented by strain MMS-IIB-91,  
148 which was isolated from Lake Zurich, Switzerland. Rods with lengths of  $0.46\pm 0.47$   $\mu\text{m}$   
149 and diameters of  $0.26\pm 0.20$   $\mu\text{m}$  (Table S3, Figure S1). The initial pure culture was  
150 lost after a few propagations to fresh medium; no growing culture is available. The  
151 initial culture grew well in sterile lake water amended with inorganic basal medium,  
152 minimal carbon medium, vitamins and amino acids. 'Ca. N. abundans' MMS-IIB-91  
153 has a genome size of 1.16 Mbp and a genomic GC content of 40.2 %. It is  
154 auxotrophic for reduced sulfur sources, several amino acids (methionine, lysine,  
155 ornithine, histidine, betaine), several vitamins (B1, B5, B7, B12), and possesses  
156 rhodopsins (Table S7). A complete genome is available at Genbank (CP016779).  
157 Phylogenetic analyses of 476 concatenated protein sequences, 16S rRNA, 23S  
158 rRNA, and rhodopsin genes, as well as average nucleotide identities and protein  
159 similarities indicated the affiliation of the *Candidatus* taxon to the novel genus 'Ca.  
160 Nanopelagicus' of the family 'Ca. Nanopelagicaceae' and the novel order 'Ca.  
161 Nanopelagicales'.

162 'Candidatus Planktophila limnetica' [Plank.to'phi.la. N.L.neut. n. *plankton*  
163 plankton; N.L. fem. adj. *phila* friendly to; N.L. fem. n. *Planktophila* the friend (fem.) of  
164 plankton; lim.ne'ti.ca. N.L. fem. adj. *limnetica* pertaining to lakes]. According to the  
165 previous description of a mixed culture (MWH-EgelM2-3.acl)(Jezbera *et al.*, 2009)  
166 that has a 100% identical 16S rRNA gene sequences with strain MMS-VB-114, we  
167 propose the name 'Ca. P. limnetica' for strain MMS-VB-114 and make an amended  
168 description based on a complete genome. Represented by strain MMS-VB-114,  
169 which was isolated from Lake Zurich, Switzerland. Curved rods with lengths of  
170  $0.38\pm 0.10$   $\mu\text{m}$  and diameters of  $0.25\pm 0.06$   $\mu\text{m}$  (Table S3, Figure S1). The initial pure  
171 culture was lost after a few propagations to fresh medium; no growing culture is  
172 available. The initial culture grew well in sterile lake water amended with pyruvate,  
173 urea, vitamins, and amino acids. 'Ca. P. limnetica' MMS-VB-114 has a genome size  
174 of 1.33 Mbp and a genomic GC content of 45.0 %. It is auxotrophic for reduced sulfur  
175 sources and vitamins (B1, B5, B7), and possesses rhodopsins (Table S7). A  
176 complete genome is available at Genbank (CP016782). Phylogenetic analyses of  
177 476 concatenated protein sequences, 16S rRNA, 23S rRNA, and rhodopsin genes,  
178 as well as average nucleotide identities and protein similarities indicated the affiliation  
179 of the *Candidatus* taxon to the family 'Ca. Nanopelagicaceae' and the novel order  
180 'Ca. Nanopelagicales'.

181 'Candidatus Planktophila dulcis' [dul'cis. L. fem. adj. *dulcis* sweet; referring to a  
182 high diversity of sugar transporters and metabolism]. Represented by strain MMS-  
183 IIA-65, which was isolated from Lake Zurich, Switzerland. Curved rods with lengths of  
184  $0.44\pm 0.09$   $\mu\text{m}$  and diameters of  $0.26\pm 0.03$   $\mu\text{m}$  (Table S3, Figure S1). The initial pure  
185 culture was lost after a few propagations to fresh medium; no growing culture is  
186 available. The initial culture grew well in sterile lake water amended with pyruvate,  
187 urea, minimal carbon medium, vitamins, and amino acids. 'Ca. P. dulcis' MMS-IIA-65  
188 has a genome size of 1.35 Mbp and a genomic GC content of 48.0 %. It is  
189 auxotrophic for reduced sulfur sources, betaine, and several vitamins (B1, B5, B7,  
190 B12), and possesses rhodopsins (Table S7). It has a high number of different  
191 carbohydrate transporters. A complete genome is available at Genbank (CP016777).

192 Phylogenetic analyses of 476 concatenated protein sequences, 16S rRNA, 23S  
193 rRNA, and rhodopsin genes, as well as average nucleotide identities and protein  
194 similarities indicated the affiliation of the *Candidatus* taxon to the genus 'Ca.  
195 Planktophila' of the family 'Ca. Nanopelagiceae' and the novel order 'Ca.  
196 Nanopelagicales'. Two more strains (MMS-IA-53 and MMS-21-155) isolated from  
197 Lake Zurich share high similarities with strain MMS-IIA-65 and are thus affiliated to  
198 the same *Candidatus* species. This assignment is based on similar cell and genome  
199 sizes, similar metabolism, phylogenetic analyses of 476 concatenated protein  
200 sequences, 16S rRNA (100% identical), 23S rRNA, and rhodopsin genes, as well as  
201 average nucleotide identities (<97%) and protein similarities (<94%). Complete  
202 genomes of 'Ca. P. dulcis' MMS-IA-53 and MMS-21-155 are available at Genbank  
203 (CP016772, CP016770).

204 '*Candidatus* Planktophila sulfonica' [sul.fo'ni.ca. N.L. fem. adj. *sulfonica*  
205 pertaining to sulfonate; referring to sulfonate transporters]. Represented by strain  
206 MMS-IA-56, which was isolated from Lake Zurich, Switzerland. Curved rods with  
207 lengths of 0.50±0.14 µm and diameters of 0.28±0.06 µm (Table S3, Figure S1). The  
208 initial pure culture was lost after a few propagations to fresh medium; no growing  
209 culture is available. The initial culture grew well in sterile lake water amended with  
210 inorganic basal medium, minimal carbon medium, vitamins, and amino acids. It is so  
211 far the only member of the order 'Ca. Nanopelagicales' that possesses membrane  
212 transporters for sulfonates. 'Ca. P. sulfonica' MMS-IA-56 has a genome size of 1.34  
213 Mbp and a genomic GC content of 48.6 %. It is auxotrophic for reduced sulfur  
214 sources, betaine, and several vitamins (B1, B5, B7, B12), and possesses rhodopsins  
215 (Table S7). A complete genome is available at Genbank (CP016773). Phylogenetic  
216 analyses of 476 concatenated protein sequences, 16S rRNA, 23S rRNA, and  
217 rhodopsin genes, as well as average nucleotide identities and protein similarities  
218 indicated the affiliation of the *Candidatus* taxon to the genus 'Ca. Planktophila' of the  
219 family 'Ca. Nanopelagiceae' and the novel order 'Ca. Nanopelagicales'.

220 '*Candidatus* Planktophila versatilis' [ver.sa'ti.lis. L. fem. adj. *versatilis* versatile;  
221 referring to high metabolic versatility]. Represented by strain MMS-IA-79, which was  
222 isolated from Lake Zurich, Switzerland. Curved rods with lengths of 0.45±0.10 µm  
223 and diameters of 0.27±0.04 µm (Table S3, Figure S1). The initial pure culture was  
224 lost after a few propagations to fresh medium; no growing culture is available. The  
225 initial culture grew well in sterile lake water amended with inorganic basal medium,  
226 minimal carbon medium, vitamins, and amino acids. 'Ca. P. versatilis' MMS-IA-79  
227 has a genome size of 1.33 Mbp and a genomic GC content of 48.2 %. It is  
228 auxotrophic for reduced sulfur sources, betaine, and several vitamins (B1, B5, B7,  
229 B12), and possesses rhodopsins (Table S7). A complete genome is available at  
230 Genbank (CP016778). Phylogenetic analyses of 476 concatenated protein  
231 sequences, 16S rRNA, 23S rRNA, and rhodopsin genes, as well as average  
232 nucleotide identities and protein similarities indicated the affiliation of the *Candidatus*  
233 taxon to the genus 'Ca. Planktophila' of the family 'Ca. Nanopelagiceae' and the  
234 novel order 'Ca. Nanopelagicales'. Three additional strains (MMS-IIB-79, MMS-IA-  
235 105, and MMS-IIB-142) isolated from Lake Zurich share high similarities with strain  
236 MMS-IA-79 and are thus affiliated to the same *Candidatus* species. This assignment  
237 is based on similar cell and genome sizes, similar metabolism, phylogenetic analyses  
238 of 476 concatenated protein sequences, 16S rRNA (100% identical), 23S rRNA, and  
239 rhodopsin genes, as well as average nucleotide identities (<95%) and protein  
240 similarities (<90%). Complete genomes of 'Ca. P. versatilis' MMS-IIB-79, MMS-IA-



241 105, and MMS-IIB-142 are available at Genbank (CP016774, CP016775,  
242 CP016781).

243 '*Candidatus* Planktophila lacus' [la'cus. L. gen. masc. n. *lacus* of a lake].  
244 Represented by strain MMS-21-148, which was isolated from Lake Zurich,  
245 Switzerland. Rods with lengths of  $0.41 \pm 0.10$   $\mu\text{m}$  and diameters of  $0.30 \pm 0.06$   $\mu\text{m}$   
246 (Table S3, Figure S1). The initial pure culture was lost after a few propagations to  
247 fresh medium; no growing culture is available. The initial culture grew well in sterile  
248 lake water amended with minimal carbon medium, vitamins, and amino acids. '*Ca. P.*  
249 *lacus*' MMS-21-148 has a genome size of 1.46 Mbp and a genomic GC content of  
250 47.5 %. It is auxotrophic for reduced sulfur sources, betaine, and several vitamins  
251 (B1, B5, B7, B12), and possesses rhodopsins (Table S7). A complete genome is  
252 available at Genbank (CP016769). Phylogenetic analyses of 476 concatenated  
253 protein sequences, 16S rRNA, 23S rRNA, and rhodopsin genes, as well as average  
254 nucleotide identities and protein similarities indicated the affiliation of the *Candidatus*  
255 taxon to the genus '*Ca. Planktophila*' of the family '*Ca. Nanopelagicaceae*' and the  
256 novel order '*Ca. Nanopelagicales*'. Two additional strains (MMS-IIB-106 and MMS-  
257 IIB-60) isolated from Lake Zurich share high similarities with strain MMS-21-148 and  
258 are thus affiliated to the same *Candidatus* species. This assignment is based on  
259 similar cell and genome sizes, similar metabolism, phylogenetic analyses of 476  
260 concatenated protein sequences, 16S rRNA (100% identical), 23S rRNA, and  
261 rhodopsin genes, as well as average nucleotide identities (<94%) and protein  
262 similarities (<95%). Complete genomes of '*Ca. P. lacus*' MMS-IIB-60 and MMS-IIB-  
263 106 are available at Genbank (CP016780, CP016783).

264 '*Candidatus* Planktophila vernalis' [ver.na'lis. L. fem. adj. *vernalis* belonging to  
265 spring; referring to high abundances in spring]. Represented by strain MMS-IIA-15,  
266 which was isolated from Lake Zurich, Switzerland. Curved rods with lengths of  
267  $0.43 \pm 0.12$   $\mu\text{m}$  and diameters of  $0.26 \pm 0.05$   $\mu\text{m}$  (Table S3, Figure S1). The initial pure  
268 culture was lost after a few propagations to fresh medium; no growing culture is  
269 available. The initial culture grew well in sterile lake water amended with pyruvate,  
270 urea, minimal carbon medium, vitamins, and amino acids. '*Ca. P. vernalis*' MMS-IIA-  
271 15 has a genome size of 1.36 Mbp and a genomic GC content of 45.7 %. It is  
272 auxotrophic for reduced sulfur sources, serine, and several vitamins (B1, B5, B7,  
273 B12), and possesses rhodopsins (Table S7). '*Ca. P. vernalis*' MMS-IIA-15 can be  
274 recognized by the presence of the diagnostic oligonucleotide sequence 5'-  
275 AACTACTACCACACCGGTTTCG-3' in the 23S rRNA gene (positions 1420-1441, *E.*  
276 *coli* numbering). A complete genome is available at Genbank (CP016776).  
277 Phylogenetic analyses of 476 concatenated protein sequences, 16S rRNA, 23S  
278 rRNA, and rhodopsin genes, as well as average nucleotide identities and protein  
279 similarities indicated the affiliation of the *Candidatus* taxon to the genus '*Ca.*  
280 *Planktophila*' of the family '*Ca. Nanopelagicaceae*' and the novel order '*Ca.*  
281 *Nanopelagicales*'.

#### References:

Beier S, Bertilsson S (2011). Uncoupling of chitinase activity and uptake of hydrolysis products in freshwater bacterioplankton. *Limnol Oceanogr* **56**: 1179-1188.

- Buck U, Grossart HP, Amann R, Pernthaler J (2009). Substrate incorporation patterns of bacterioplankton populations in stratified and mixed waters of a humic lake. *Environ Microbiol* **11**: 1854-1865.
- Eckert EM, Salcher MM, Posch T, Eugster B, Pernthaler J (2012). Rapid successions affect microbial N-acetyl-glucosamine uptake patterns during a lacustrine spring phytoplankton bloom. *Environ Microbiol* **14**: 794-806.
- Garcia SL, McMahon KD, Martinez-Garcia M, Srivastava A, Sczyrba A, Stepanauskas R *et al* (2013). Metabolic potential of a single cell belonging to one of the most abundant lineages in freshwater bacterioplankton. *ISME J* **7**: 137-147.
- Ghai R, Mizuno CM, Picazo A, Camacho A, Rodriguez-Valera F (2014). Key roles for freshwater Actinobacteria revealed by deep metagenomic sequencing. *Molecular Ecology* **23**: 6073-6090.
- Ghylin TW, Garcia SL, Moya F, Oyserman BO, Schwientek P, Forest KT *et al* (2014). Comparative single-cell genomics reveals potential ecological niches for the freshwater acl Actinobacteria lineage. *ISME J* **8**: 2503-2516.
- Jaehme M, Slotboom Dirk J (2015). Structure, function, evolution, and application of bacterial Pnu-type vitamin transporters. *Biological Chemistry*. p 955.
- Jezbera J, Sharma AK, Brandt U, Doolittle WF, Hahn MW (2009). 'Candidatus Planktophila limnetica', an actinobacterium representing one of the most numerically important taxa in freshwater bacterioplankton. *Int J Syst Evol Microbiol* **59**: 2864-2869.
- Kang I, Ki m S, Islam MR, Cho J-C (2017). The first complete genome sequences of the acl lineage, the most abundant freshwater Actinobacteria, obtained by whole-genome-amplification of dilution-to-extinction cultures. *Scientific Reports* **7**: 42252.
- Pérez MT, Rofner C, Sommaruga R (2015). Dissolved organic monomer partitioning among bacterial groups in two oligotrophic lakes. *Environ Microbiol Rep* **7**: 265–272.
- Rofner C, Sommaruga R, Pérez MT (2016a). Differential utilization patterns of dissolved organic phosphorus compounds by heterotrophic bacteria in two mountain lakes. *FEMS Microbiol Ecol* **92**: fiw139.
- Rofner C, Sommaruga R, Teresa Pérez M (2016b). Phosphate and ATP uptake by lake bacteria: does taxonomical identity matter? *Environ Microbiol* **18**: 4782-4793.
- Salcher MM, Pernthaler J, Posch T (2010). Spatiotemporal distribution and activity patterns of bacteria from three phylogenetic groups in an oligomesotrophic lake. *Limnol Oceanogr* **55**: 846-856.
- Salcher MM, Posch T, Pernthaler J (2013). *In situ* substrate preferences of abundant bacterioplankton populations in a prealpine freshwater lake. *ISME J* **7**: 896-907.
- Vadstein O (2000). Heterotrophic, planktonic bacteria and cycling phosphorus. Phosphorus requirements, competitive ability, and food web interactions. *Advances in Microb Ecol* **16**: 115-167.
- Wetzel R (2001). *Limnology. Lake and River Ecosystems*, 3<sup>rd</sup> edn. Elsevier Academic Press.

**Figure S1:** Microphotographs and cell volumes ( $\mu\text{m}^3$ ) of isolates. The scale bar at the bottom left applies to all pictures.

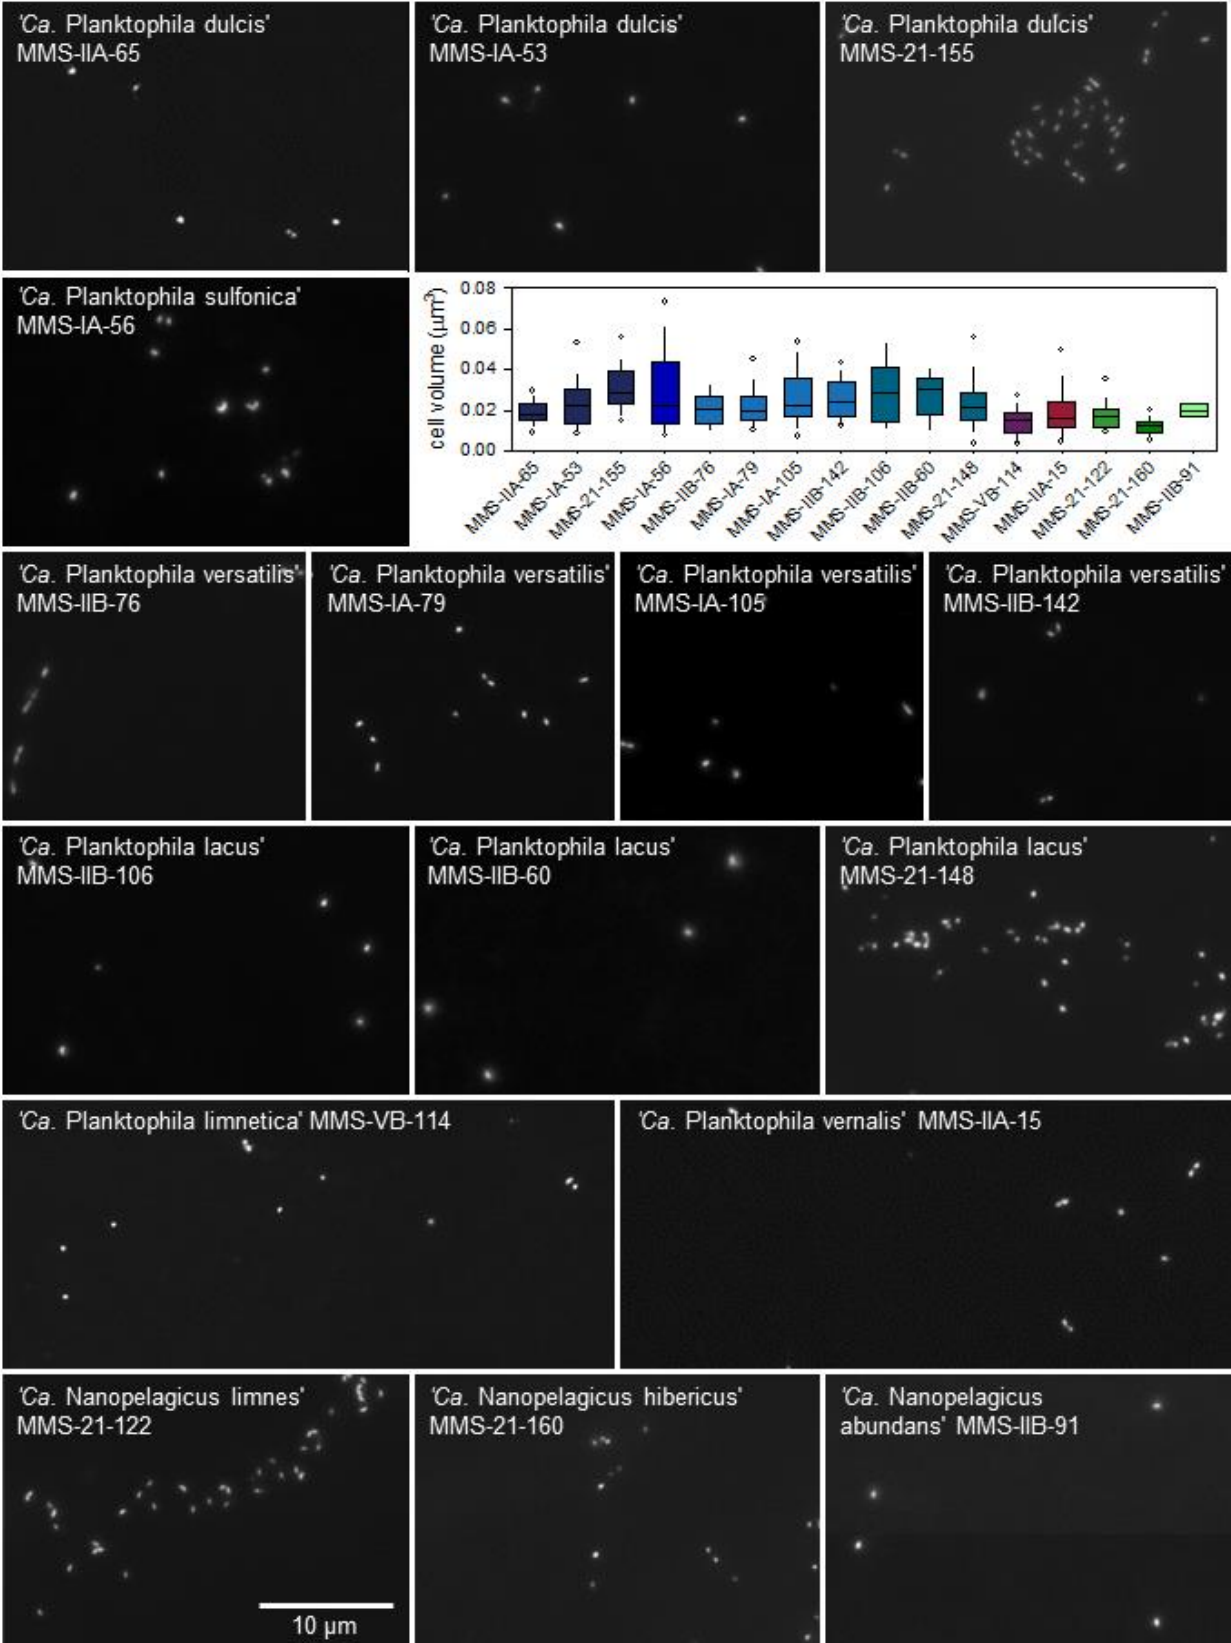



**Figure S3:** Average nucleotide identity (ANI) matrix of 'Ca. Nanopelagicales'. Species borders are marked with solid lines, genus borders with dashed lines.

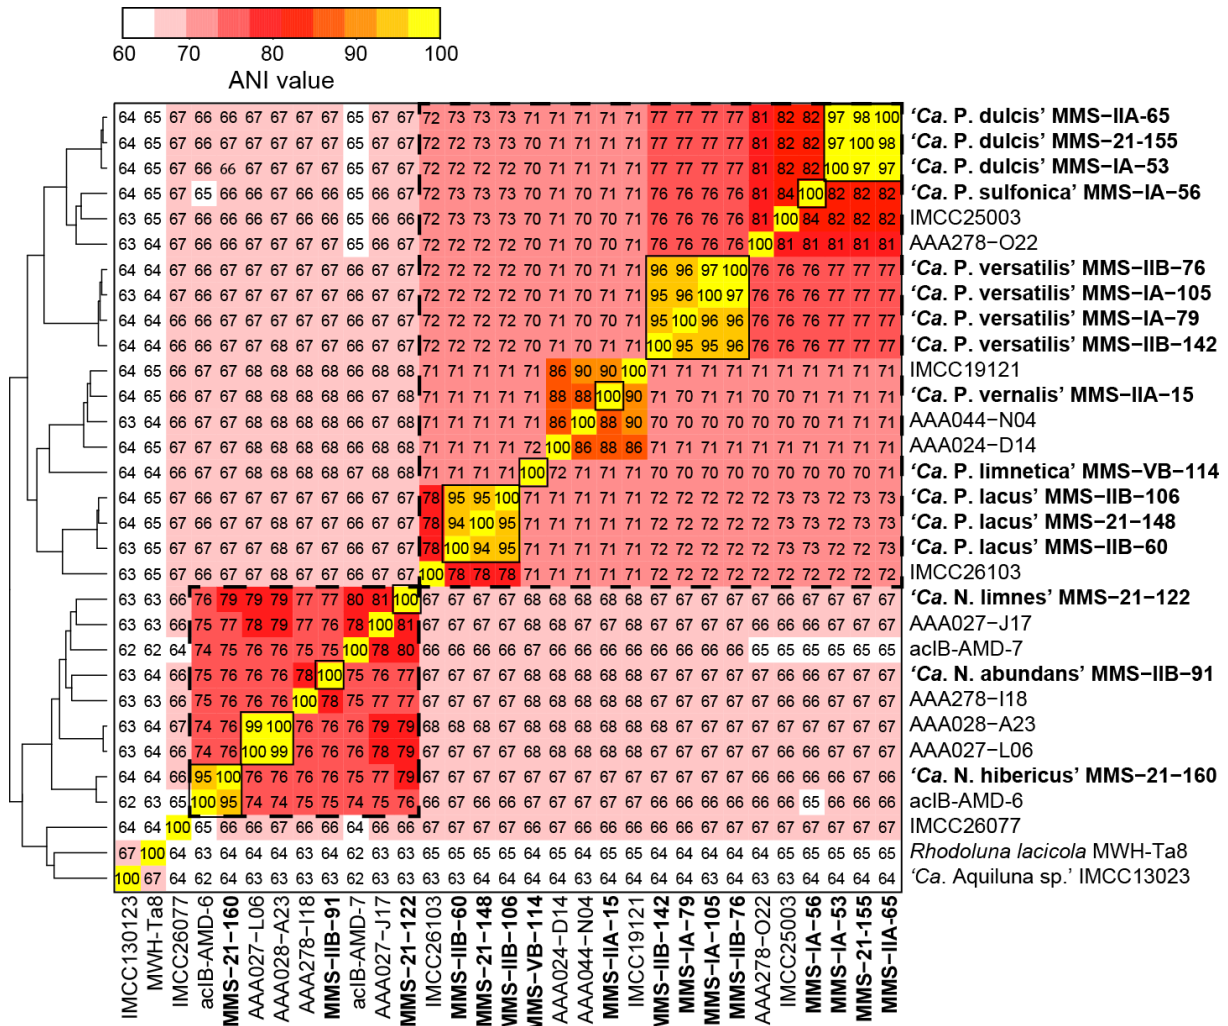

**Figure S4:** a, Average amino acid identity (AAI) matrix of 'Ca. Nanopelagicales'. b, Protein similarity (>50% identity, >50% coverage) matrix of 'Ca. Nanopelagicales'. Species borders are marked with solid lines, genus borders with dashed lines.

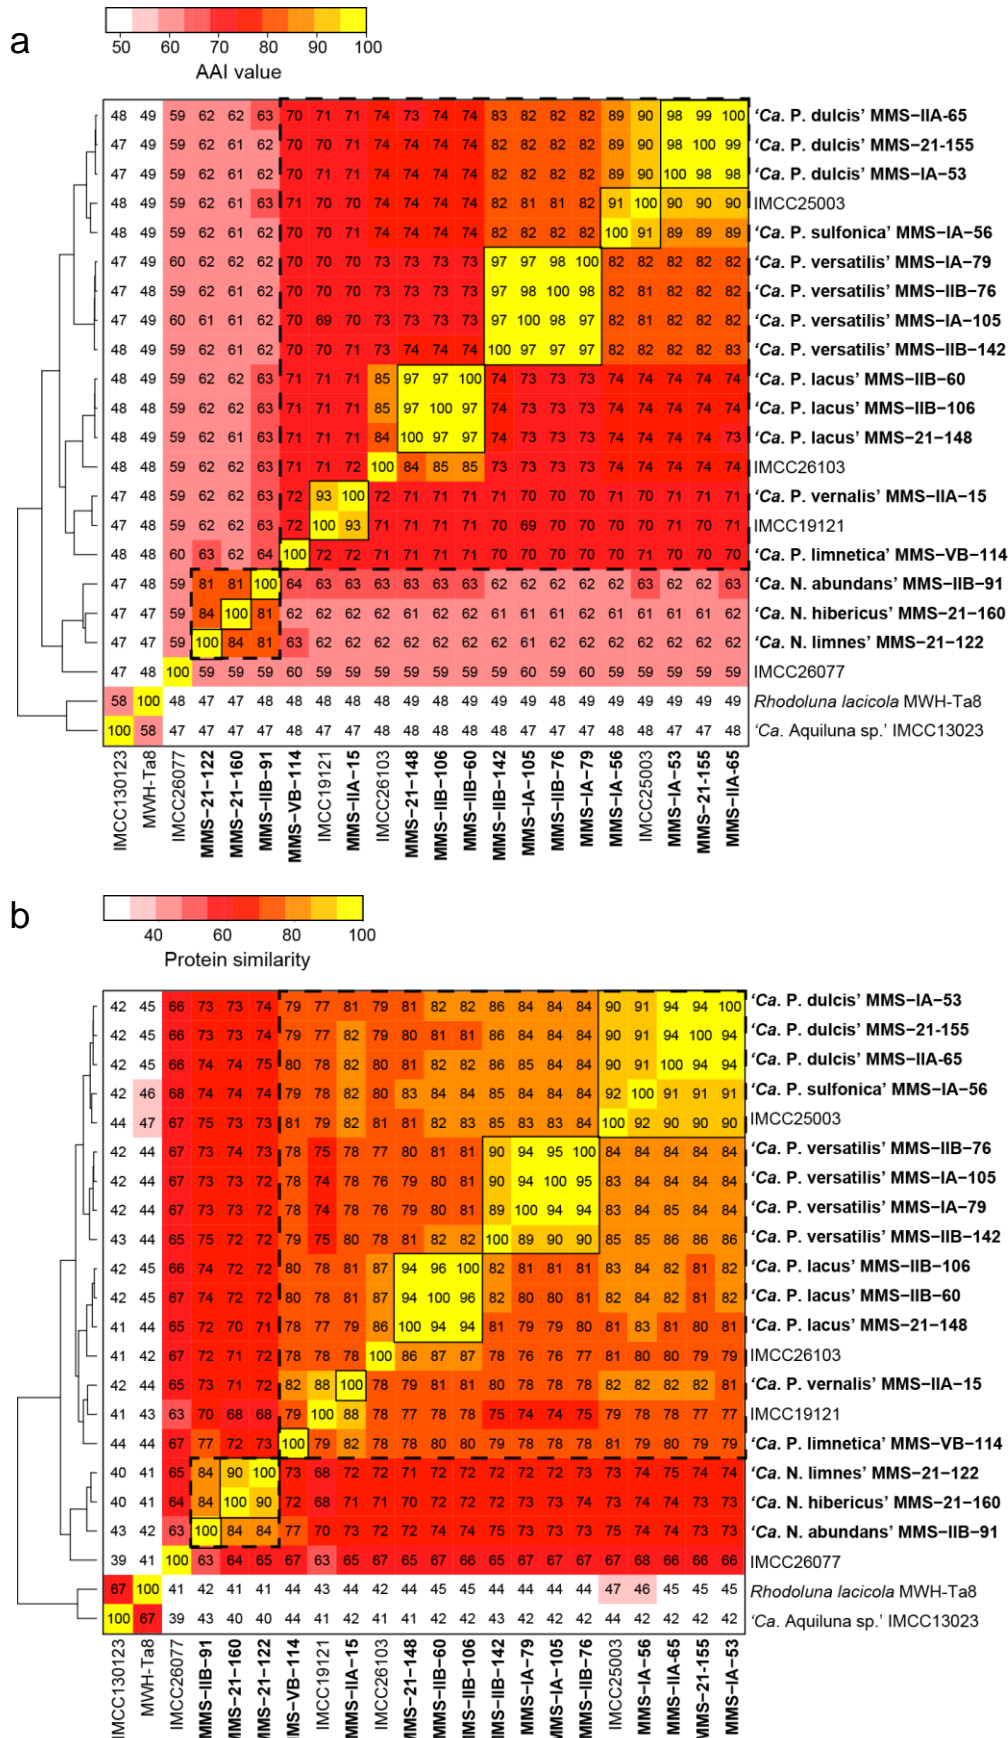

**Figure S5:** Phylogenomic tree with complete genomes of ‘*Ca. Nanopelagicales*’ only. 462 concatenated conserved proteins were used to generate a maximum-likelihood phylogenetic tree. The genomes of ‘*Ca. Aquiluna* sp.’ and *Rhodoluna ladicola* were used as outgroup. Bootstrap values are indicated by black, grey, and white circles on the nodes, and a colour key is shown on the left.

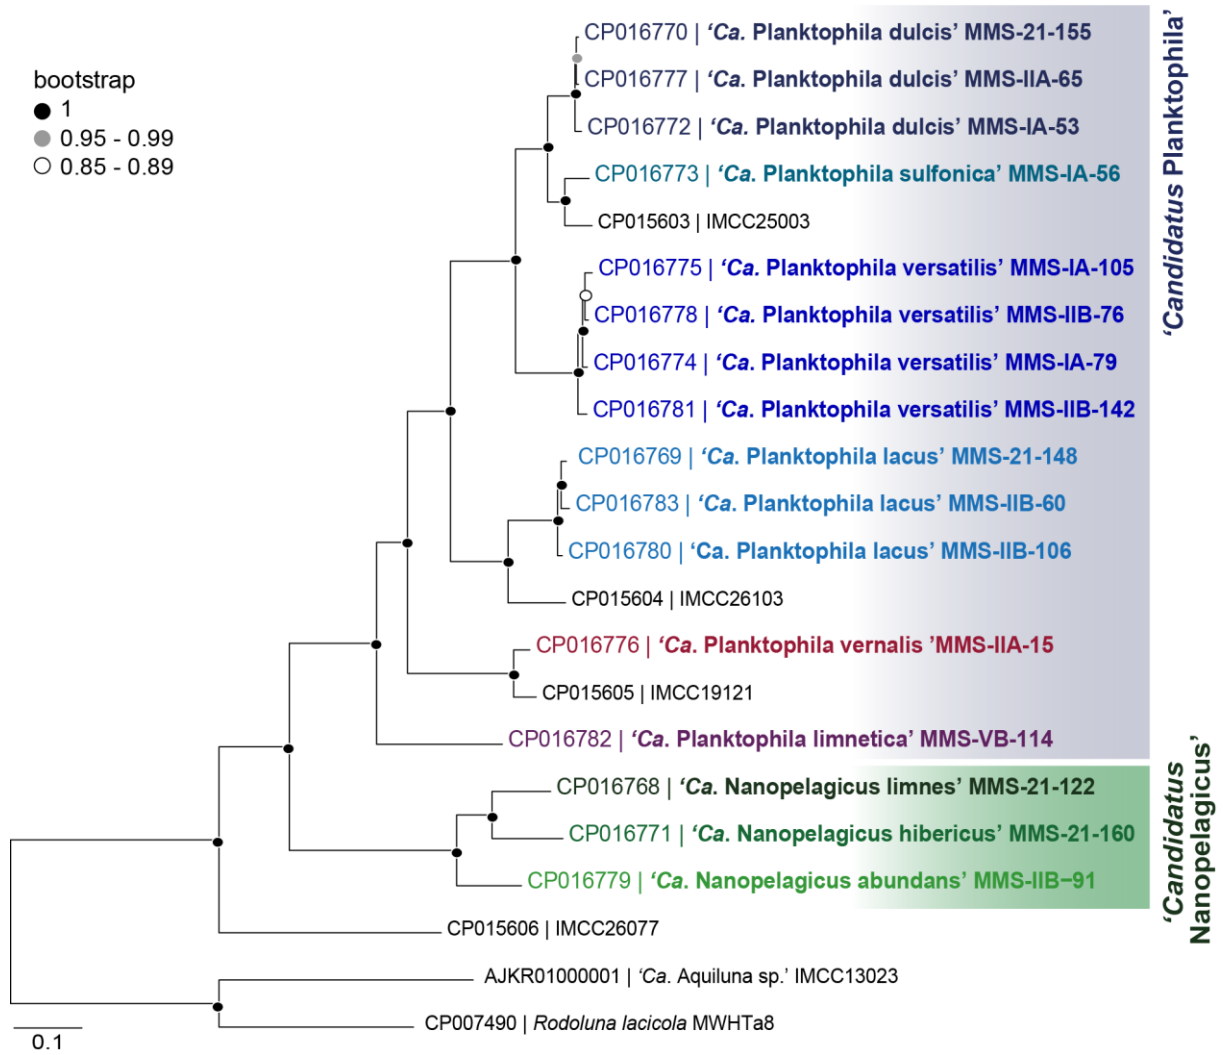





**Figure S7:** Genome streamlining in 'Ca. Nanopelagicales'. Number of predicted CDS, number of predicted sigma factor homologs, median size of intergenic spacers, and coding density versus genome size for all complete published genomes of Actinobacteria (n=610; data taken from RefSeq). 'Ca. Nanopelagicales' and *Rhodoluna laticola* are marked in different colours.

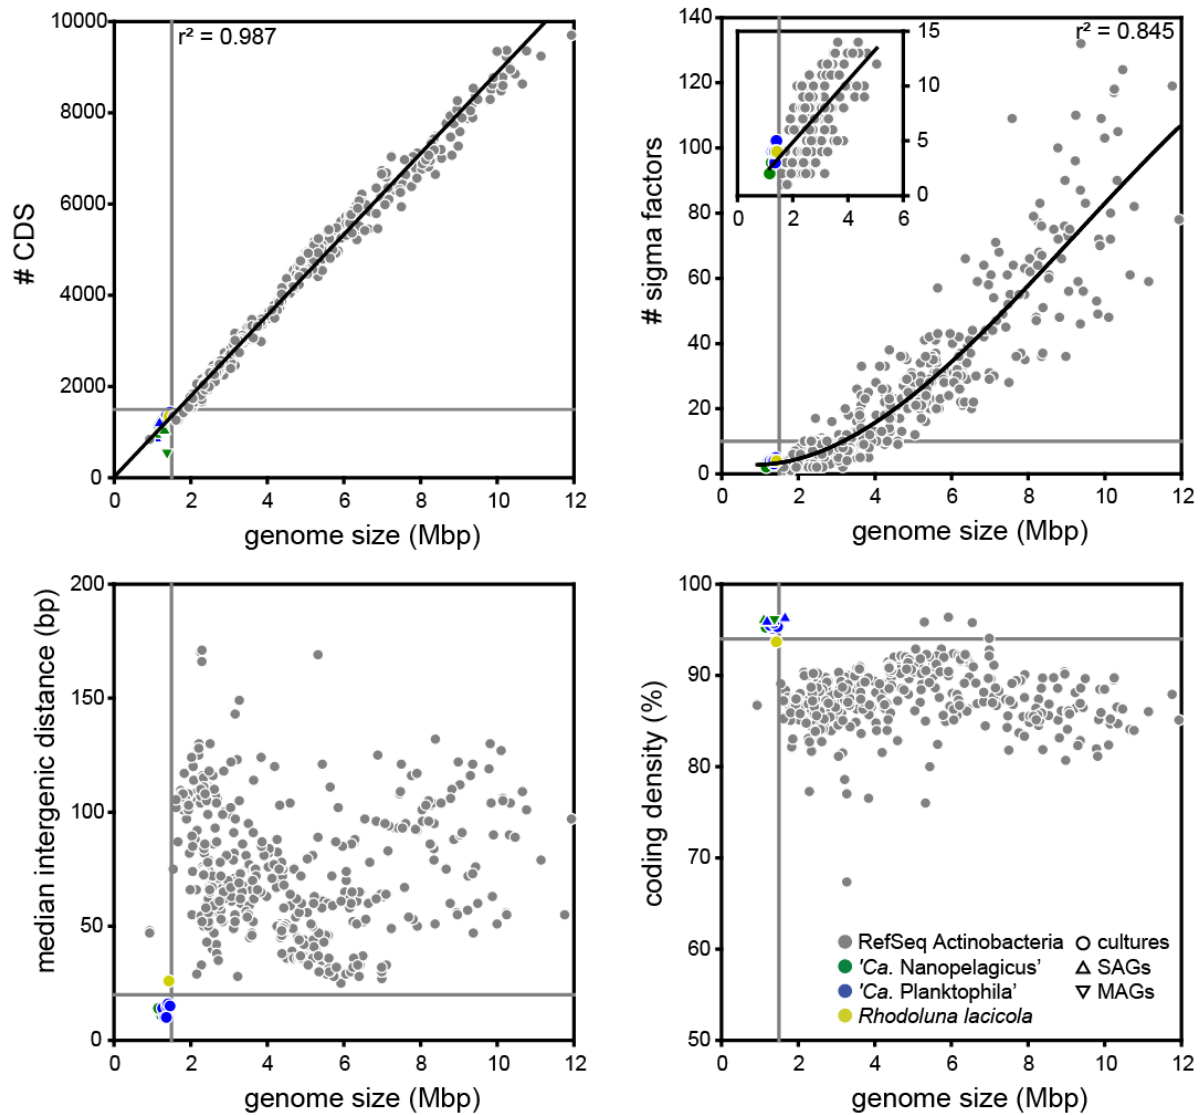

**Figure S8:** a, Bootstrapped phylogenetic tree of rhodopsin protein sequences of ‘Ca. Nanopelagicales’ and other Actinobacteria. Xanthorhodopsin sequences of *Salinibacter ruber* and *Thermus aquaticus* were used as outgroup. Bootstrap values are indicated by coloured circles on the nodes, and a colour key is shown on the left. b, Arrangement of actinorhodopsin (AR) and carotenoid synthesis genes, i.e., beta carotene (*crtE*, *crtI*, *crtB*, *crtY*) and retinal (*blh*) biosynthesis genes. Genomes are arranged according to the phylogenomic tree in Fig. S5.

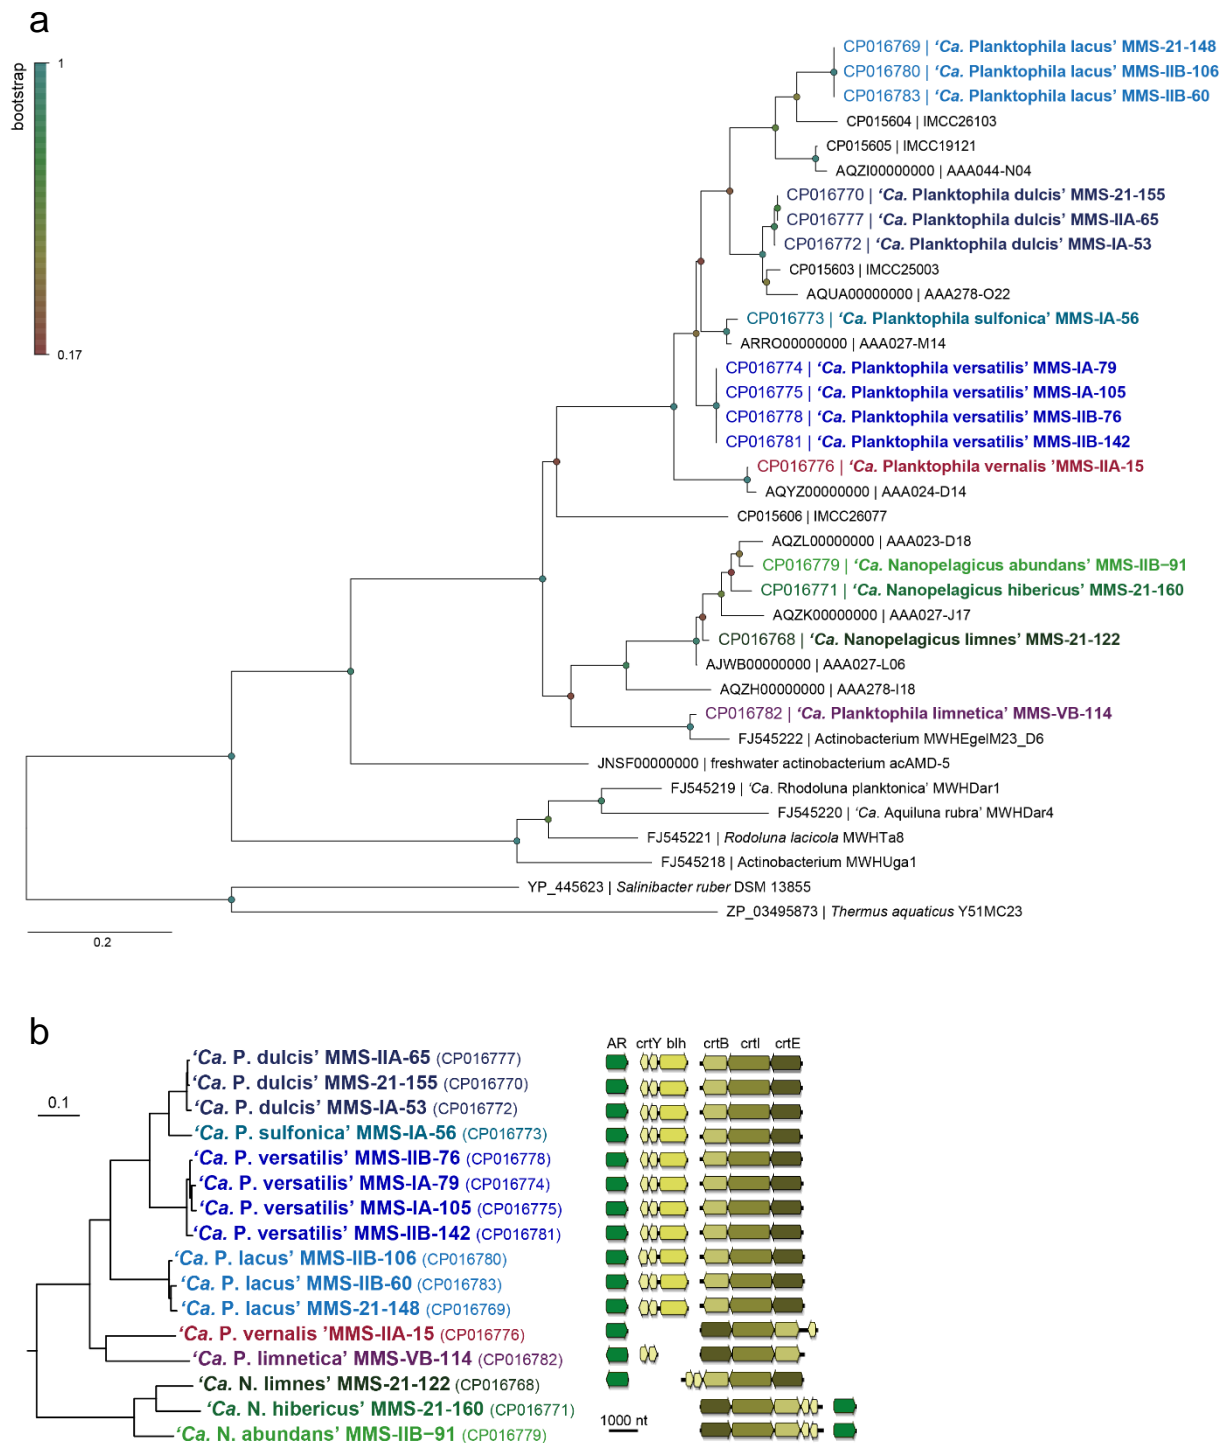

**Figure S9:** Bootstrapped maximum likelihood tree of 23S rRNA genes of ‘*Ca.* Nanopelagicales’. Target hits for the newly designed probes Pver-23S-1420 and Npel-23S-2669 are shown in brackets. ‘*Ca.* Aquiluna sp.’ and *Rhodoluna ladicola* were used as outgroup. Bootstrap values are shown on the nodes.

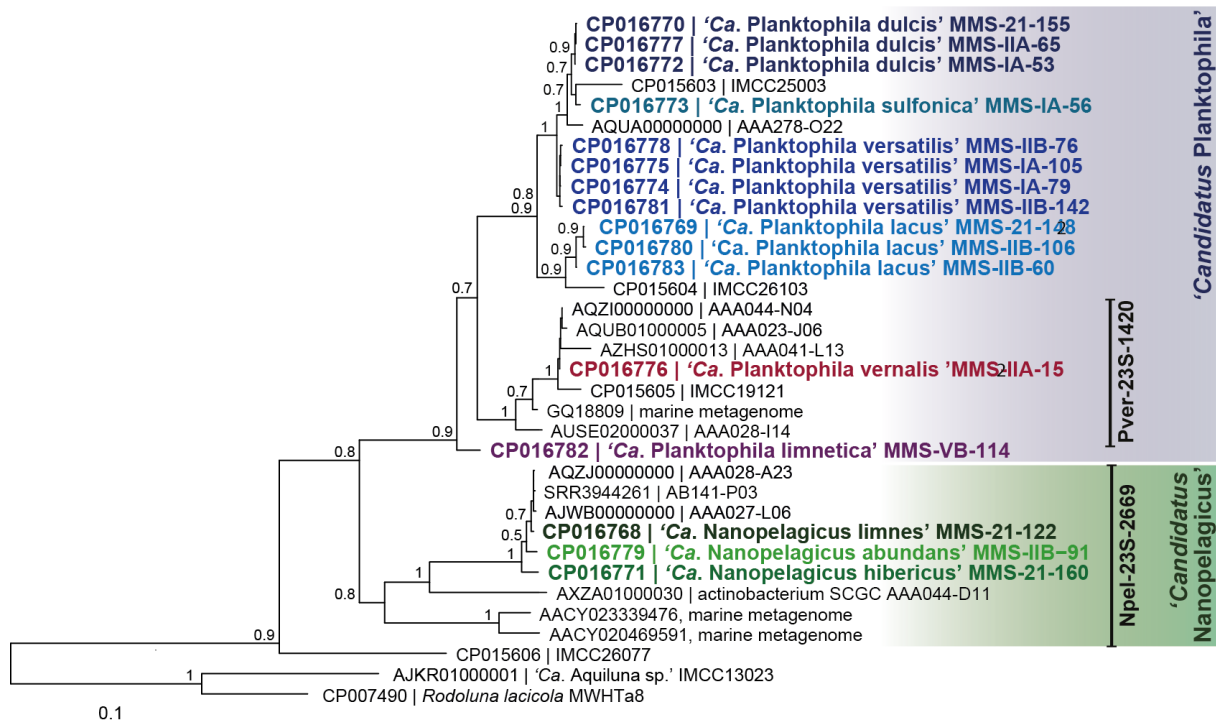

**Figure S10:** Physico-chemical data from Lake Zurich

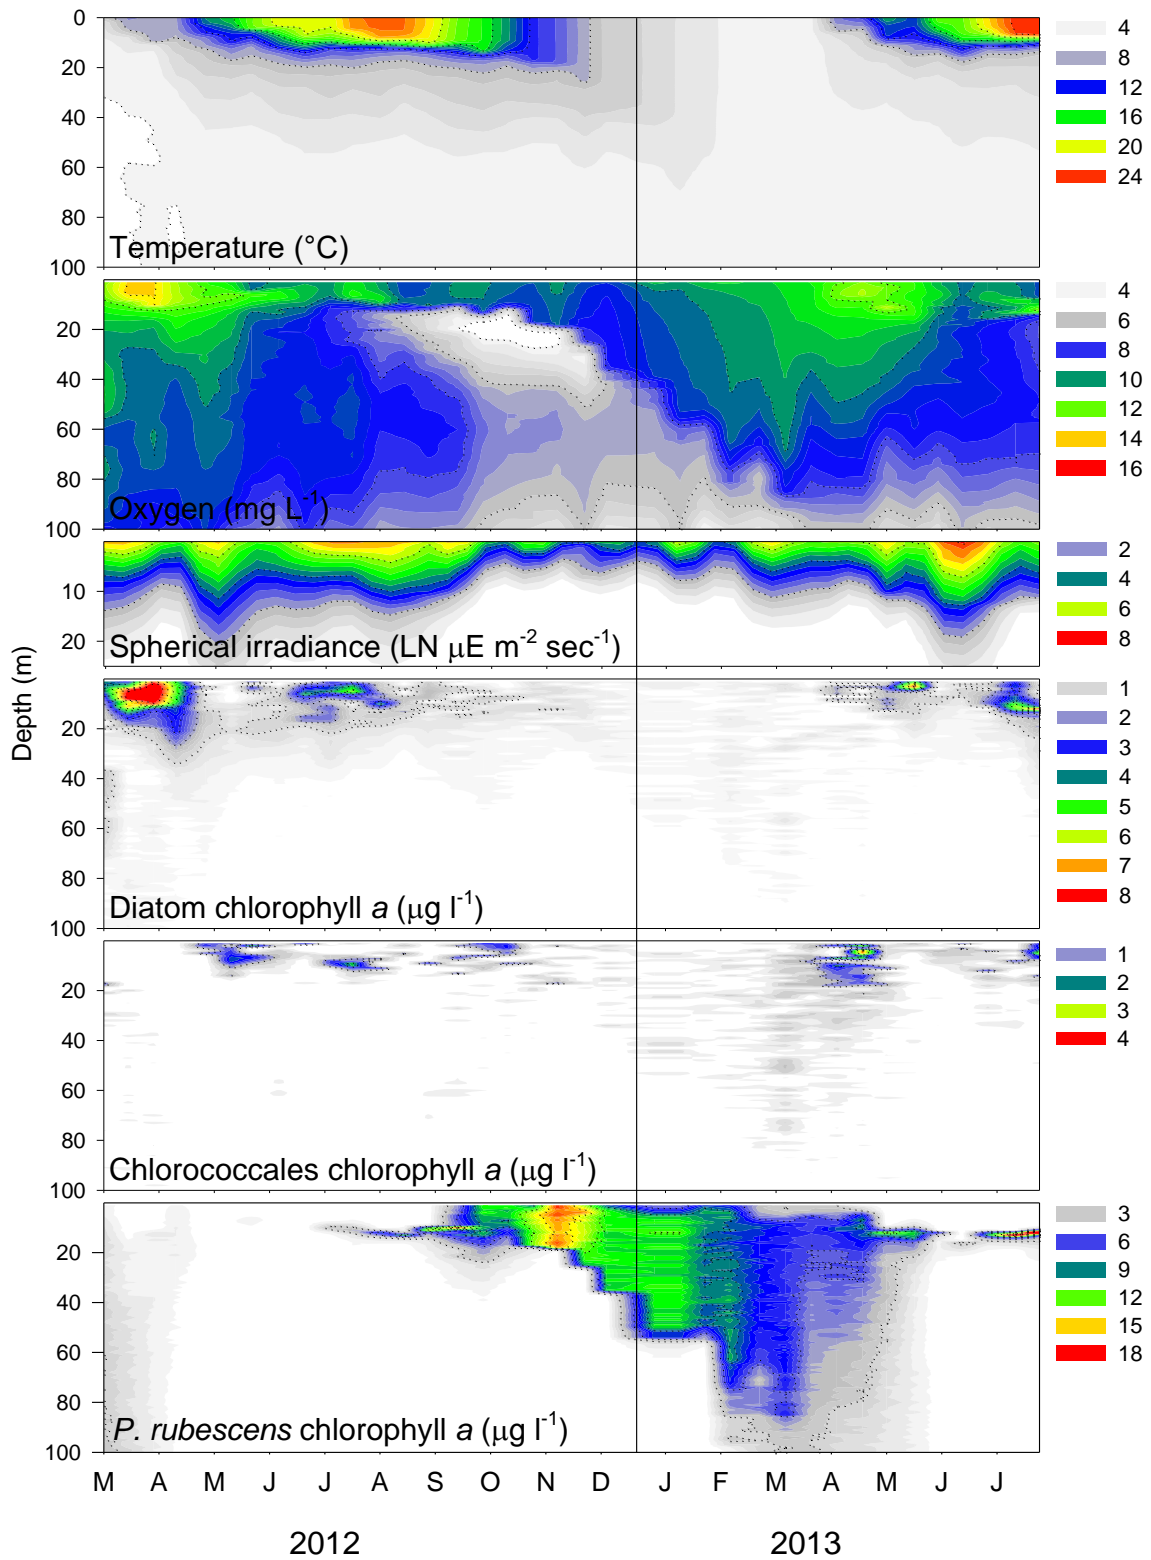

**Figure S11:** Redundancy analysis of environmental parameters explaining the variability in cell numbers of microbes affiliated to all 'Ca. Nanopelagicales', 'Ca. Nanopelagicus', and 'Ca. P. vernalis' in Lake Zurich. temp, water temperature; picocyano, abundance of picocyanobacteria; irrad, irradiation; chloro, chlorophyll a associated with chlorophytes; diatom, chlorophyll a associated with diatoms; NH4, ammonium concentrations; O2, oxygen concentrations; PO4, phosphate concentrations; NO3, nitrate concentrations; depth, sampling depth.

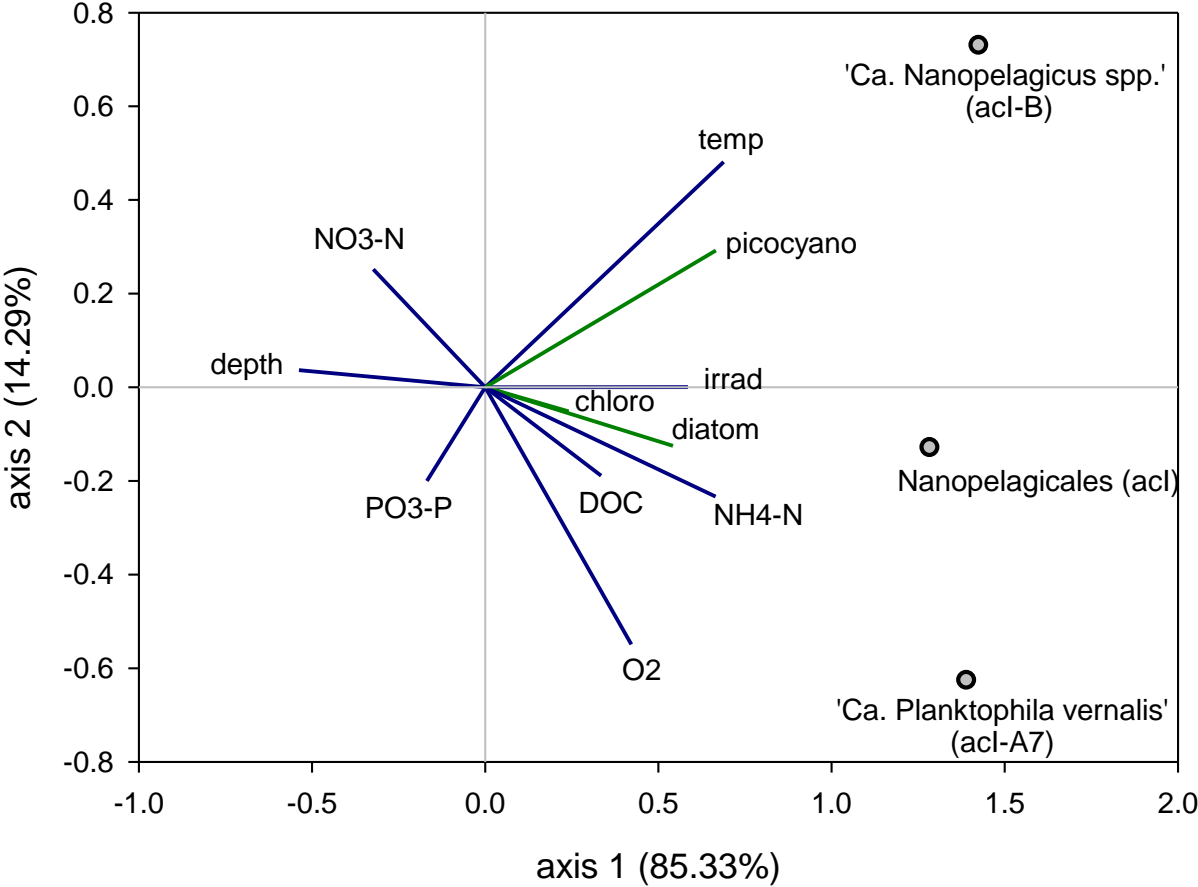

**Figure S12:** Metagenomic fragment recruitment of ‘*Ca. Nanopelagicus*’ (a) and ‘*Ca. Planktophila*’ (b) across diverse freshwater ecosystems (see Table S7 for details).

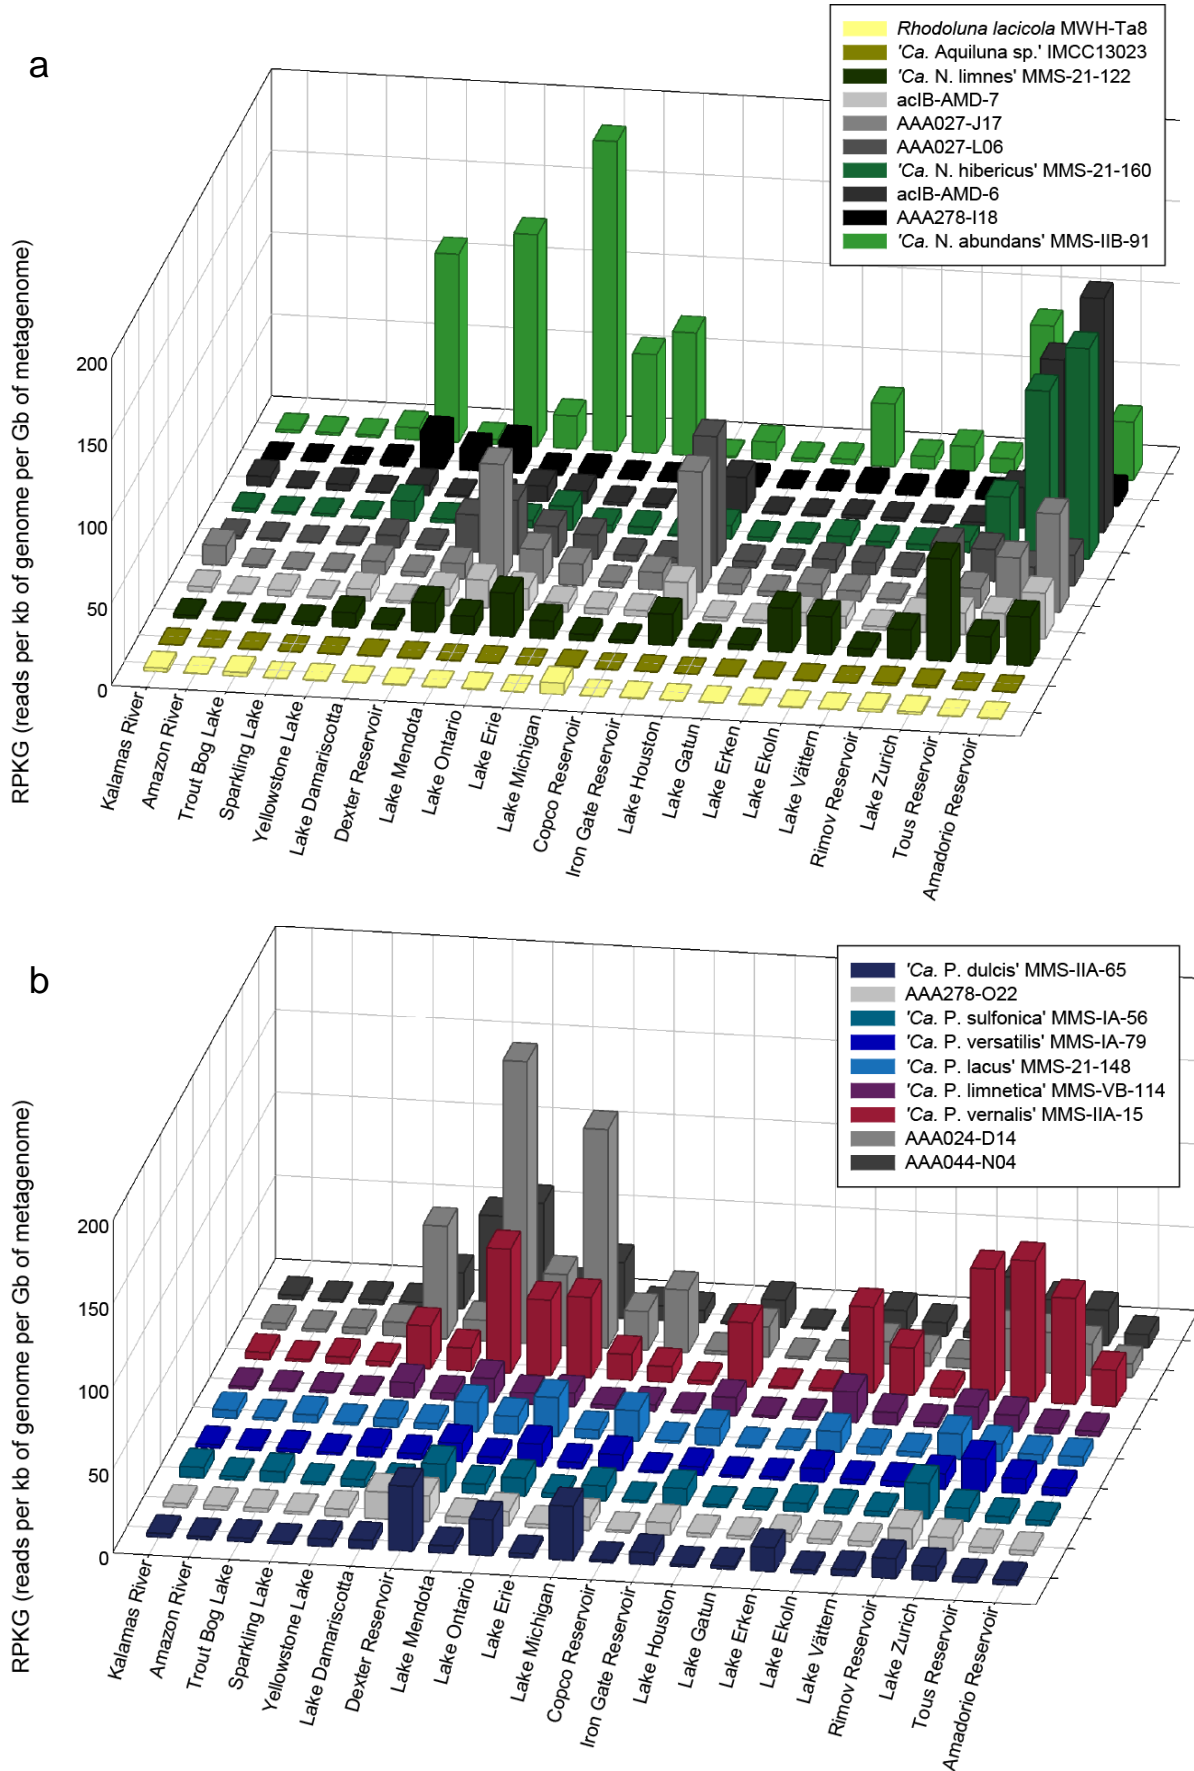

**Figure S13:** Recruitment plots of time-series metagenomes from Lake Mendota, USA.

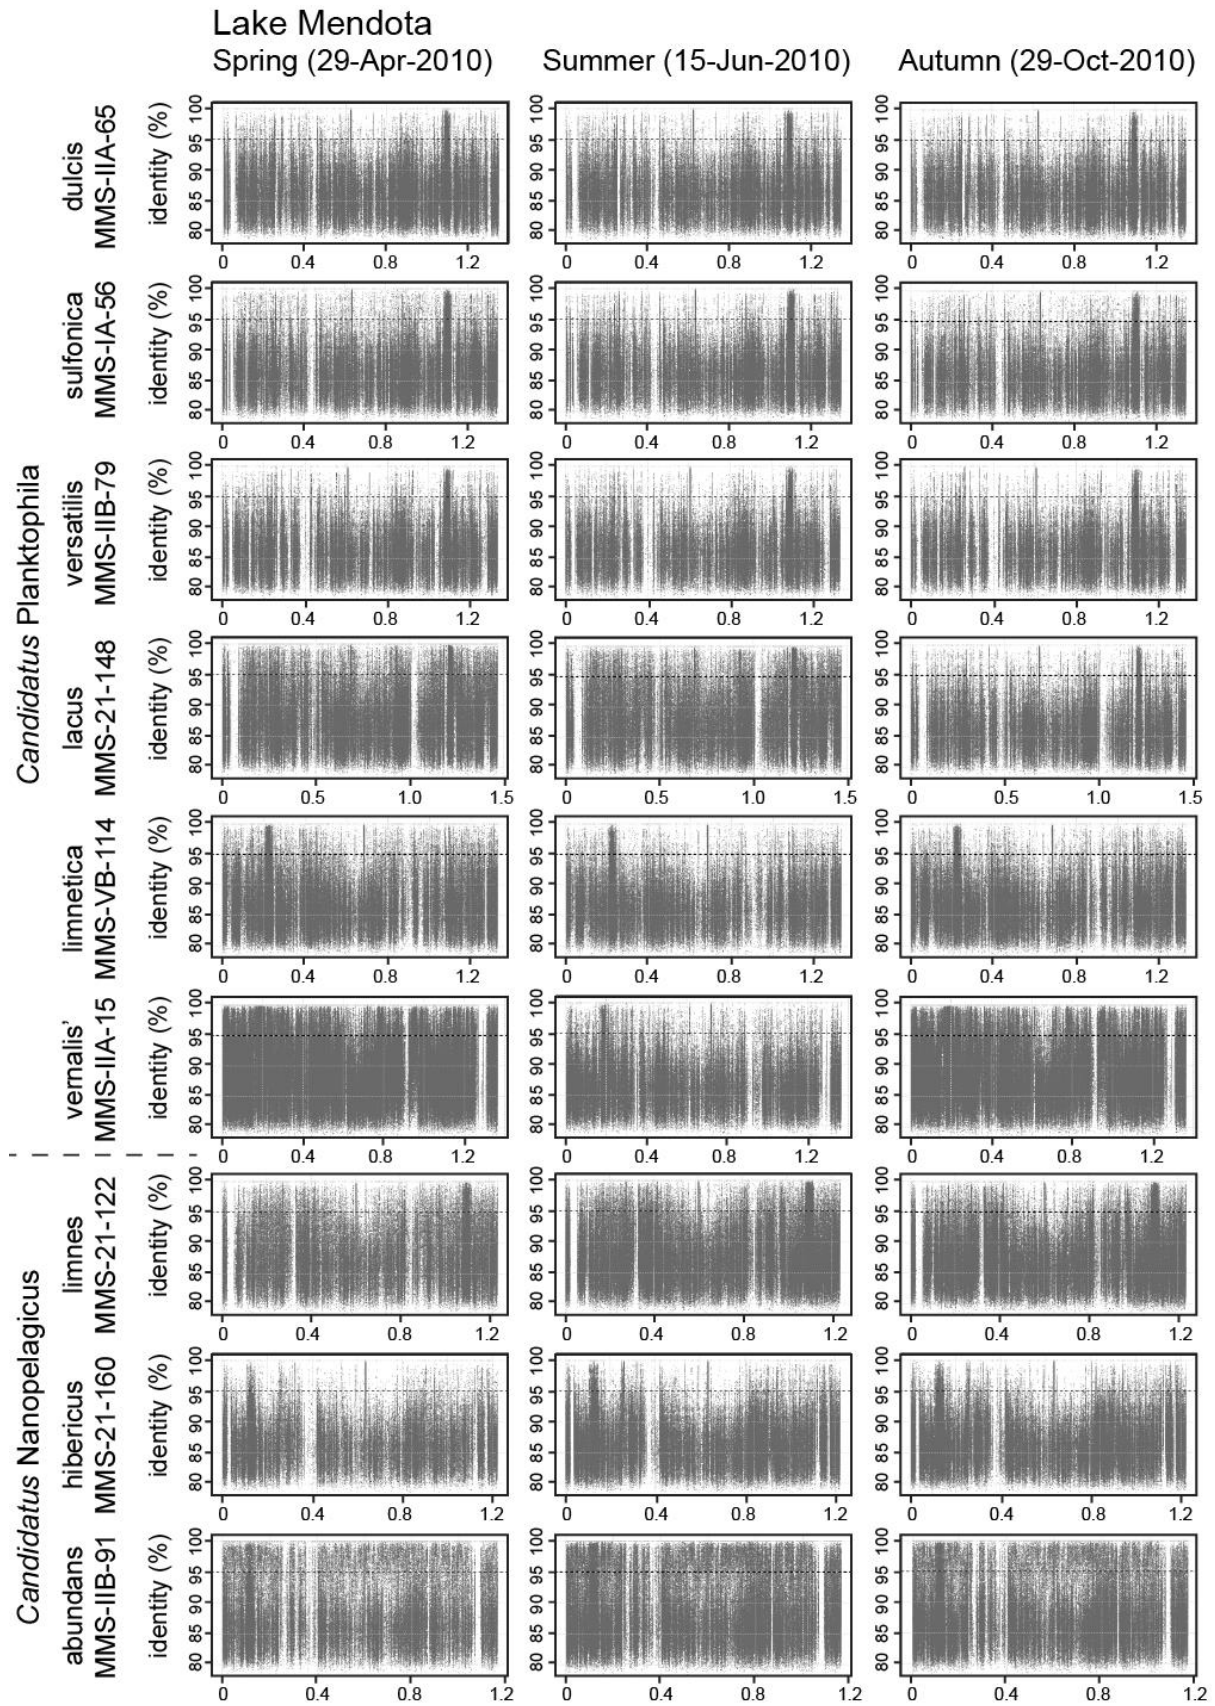

**Figure S14:** Whole-genome alignment of all 13 ‘Ca. Planktophila’ strains. The genomes have been linearized for simplicity and are arranged in the same order as in the phylogenomic tree in Fig. 1b. Synteny and different degrees of sequence similarity are indicated by vertical lines connecting the genomes.

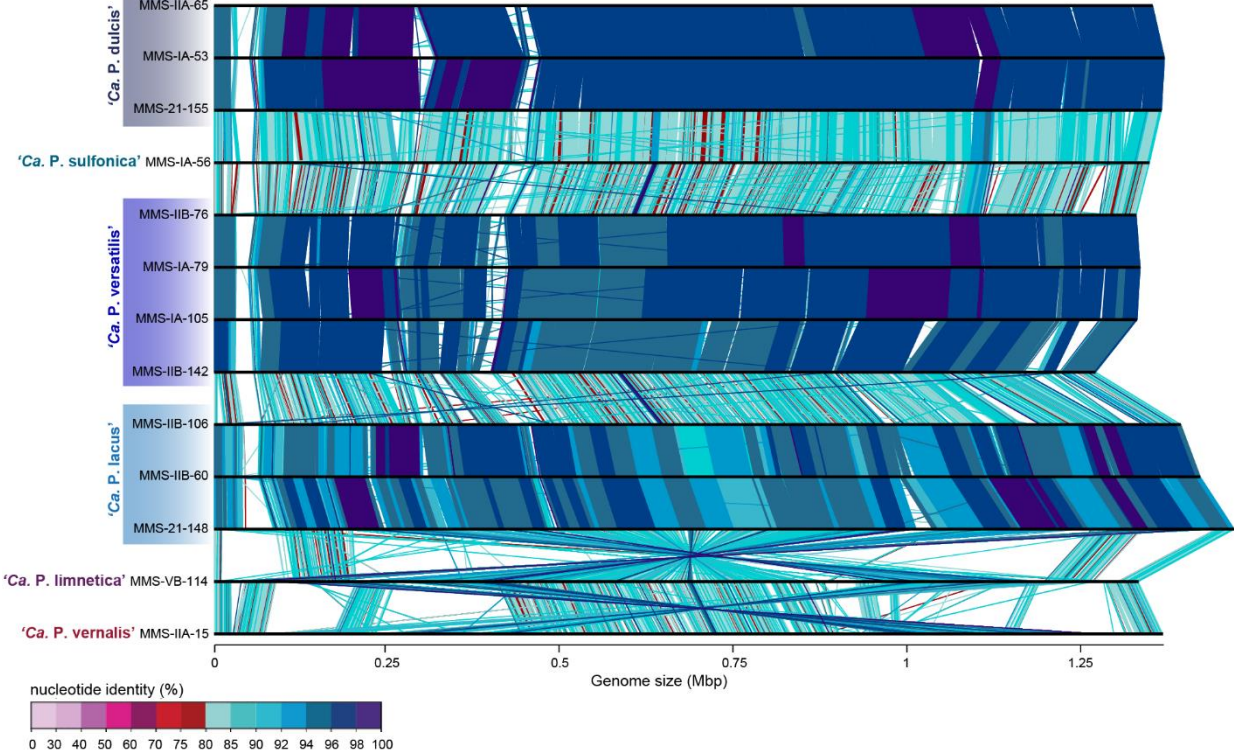



**Figure S15:** Whole-genome alignment of the three ‘*Ca. Nanopelagicus*’ strains. The genomes have been linearized for simplicity and are arranged in the same order as in the phylogenomic tree in Fig. 1b. Synteny and different degrees of sequence similarity are indicated by vertical lines connecting the genomes. rRNA operons in the individual genomes are displayed as red arrows and tRNAs as short vertical lines. Genomic islands (GI) have been marked in different colours and numbered (see Table S10 for genes encoded in each island), except for ‘*Ca. N. limnes*’ MMS-21-122, which displayed a large inversion in the genome. Red: genes encoding mainly cell wall biosynthesis and modifications; Yellow: genes encoding mainly membrane transport and / or carbohydrate metabolism.

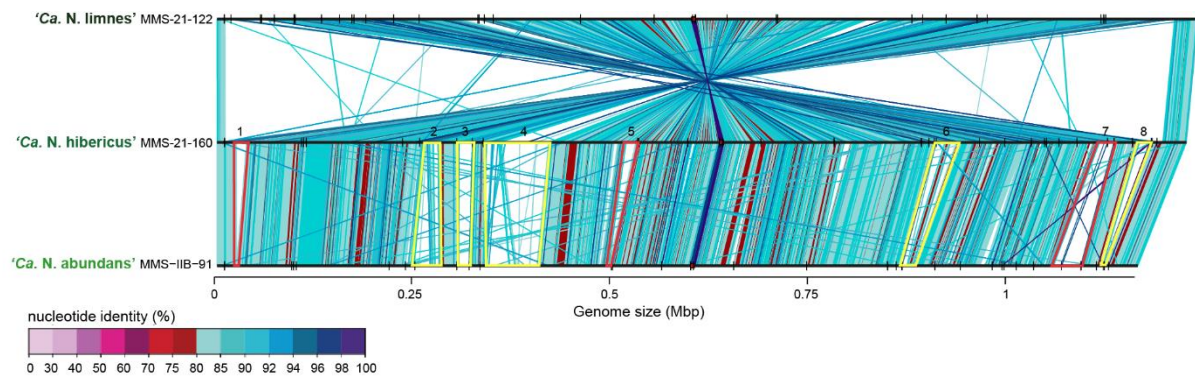

**Table S1:** Details of the isolation experiments conducted in Lake Zurich, Switzerland.

| Date       | water temp | med | # wells inoc | # cells /well | # + wells  | # pure cult | # acl     | label   | affiliation            |
|------------|------------|-----|--------------|---------------|------------|-------------|-----------|---------|------------------------|
| 25/05/2012 | 13.5       | 1   | 168          | 2.0           | 18         | 17          | 4         | MMS-21  | Pdul, Plac, Nlim, Nhib |
| 22/05/2013 | 13.2       | 2   | 120          | 1.6           | 20         | 11          | 4         | MMS-IA  | Pdul, Psul, Pvers      |
| 23/05/2013 | 13.2       | 3   | 168          | 2.0           | 128        | 95          | 2         | MMS-IIA | Pdul, Pvern            |
| 23/05/2013 | 13.2       | 2   | 168          | 2.0           | 92         | 49          | 5         | MMS-IIB | Pvers, Plac, Nabu      |
| 15/07/2013 | 20.1       | 4   | 144          | 1.8           | 51         | 30          | 1         | MMS-VB  | Plim                   |
| <b>SUM</b> |            |     | <b>768</b>   |               | <b>309</b> | <b>202</b>  | <b>16</b> |         |                        |

Abbreviations: water temp, water temperature; med, medium used for dilution-to-extinction isolation; # wells inoc, number of wells inoculated; # cells/well, number of cells inoculated per well; # + wells, number of wells with dense cultures; # pure cult, number of pure cultures; # acl, number of cultures affiliated to acl Actinobacteria; label, labeling suffix for pure cultures; Nhib, 'Ca. Nanopelagicus hibericus'; Nlim, 'Ca. Nanopelagicus limnes'; Nabu, 'Ca. Nanopelagicus abundans'; Pdul, 'Ca. Planktophila dulcis'; Plim, 'Ca. Planktophila limnetica'; Pvern, 'Ca. Planktophila vernalis'; Psul, 'Ca. Planktophila sulfonica', Pvers, 'Ca. Planktophila versatilis', Plac, 'Ca. Planktophila lacus'.

**Media:**

- 1: filtered and autoclaved lake water (LW) + 10x MC#2 + vitamins (V) + amino acids (AA)
- 2: LW + MC#2 + MC#3 + inorganic basal medium (IBM) + stock4 + V + 10xAA
- 3: LW + pyruvate (50  $\mu$ M) + urea (0.5  $\mu$ M) + MC#4 + V + 10xAA
- 4: LW + pyruvate (50  $\mu$ M) + urea (0.5  $\mu$ M) + V + 10xAA

Minimal carbon medium MC#2: 1  $\mu$ M NH<sub>4</sub>Cl, 0.1  $\mu$ M K<sub>2</sub>HPO<sub>4</sub>, 55.5  $\mu$ M D-glucose, 66.6  $\mu$ M D-ribose, 217.2  $\mu$ M formate, 217.2  $\mu$ M ethanol, 84.7  $\mu$ M succinate, 131.5  $\mu$ M glycolate, 108.6  $\mu$ M glycerol, 45.2  $\mu$ M N-acetylglucosamine

MC#3: 62.1  $\mu$ M putrescine, 39.3  $\mu$ M spermidine, 66.6  $\mu$ M D-xylose, 66.6  $\mu$ M arabinose

MC#4: 30  $\mu$ M NH<sub>4</sub>Cl, 50  $\mu$ M oxaloacetate, 50  $\mu$ M taurine, 1  $\mu$ M betaine, 40  $\mu$ M CaCl<sub>2</sub>

Amino acids (AA): 0.5  $\mu$ M isoleucine, leucine, lysine, methionine, alanine, phenylalanine, threonine, tryptophane, valine, arginine, histidine, asparagine, aspartate, cysteine, proline, serine, tyrosine, 2  $\mu$ M glutamine, glutamate, glycine

Vitamins (V): 0.593  $\mu$ M thiamine, 0.08  $\mu$ M niacin, 0.000074  $\mu$ M cobalamine, 0.005  $\mu$ M para-amino benzoic acid, 0.074  $\mu$ M pyridoxine, 0.081  $\mu$ M pantothenic acid, 0.004  $\mu$ M biotin, 0.004  $\mu$ M folic acid, 0.555  $\mu$ M myo-inositol

Inorganic basal medium (IBM, Hahn et al. 2003): 304  $\mu$ M MgSO<sub>4</sub>, 182  $\mu$ M Ca(NO<sub>3</sub>)<sub>2</sub>, 190  $\mu$ M NaHCO<sub>3</sub>, 20  $\mu$ M KCl, 16  $\mu$ M K<sub>2</sub>HP<sub>4</sub>, 17  $\mu$ M Na<sub>2</sub>EDTA-Fe, 0.1 ml TES

TES (trace element solution): 12  $\mu$ M FeCl<sub>3</sub>, 16  $\mu$ M H<sub>3</sub>BO<sub>3</sub>, 1  $\mu$ M MnCl<sub>2</sub>, 0.1  $\mu$ M ZnSO<sub>4</sub>, 0.04  $\mu$ M CuSO<sub>4</sub>, 0.04  $\mu$ M CoCl<sub>2</sub>, 0.03  $\mu$ M NaMoO<sub>4</sub>, 0.4  $\mu$ M NiCl<sub>2</sub>

**Reference:**

Hahn M, Lünsdorf H, Wu Q, Schauer M, Höfle M, Boenigk J *et al* (2003). Isolation of novel ultramicrobacteria classified as *Actinobacteria* from five freshwater habitats in Europe and Asia. *Appl Environ Microbiol* **69**: 1442-1451.

**Table S2:** Preprocessing and assembly parameters:

| sample      | strain                        | library prep    | MiSeq reagents | read filtering* | assembler               |
|-------------|-------------------------------|-----------------|----------------|-----------------|-------------------------|
| MMS-IIA-65  | 'Ca. Planktophila dulcis'     | TruSeq PCR-free | v2, 500 cycle  | t, p, k         | SPAdes-3.7.0            |
| MMS-IA-53   | 'Ca. Planktophila dulcis'     | TruSeq PCR-free | v2, 500 cycle  | t, p, k         | SPAdes-3.6.2            |
| MMS-21-155  | 'Ca. Planktophila dulcis'     | TruSeq PCR-free | v2, 500 cycle  | t, p, k         | a5_miseq_linux_20150522 |
| MMS-IA-56   | 'Ca. Planktophila sulfonica'  | TruSeq PCR-free | v2, 500 cycle  | t, p, k         | SPAdes-3.6.2            |
| MMS-IIB-76  | 'Ca. Planktophila versatilis' | TruSeq PCR-free | v2, 500 cycle  | t, p, k         | SPAdes-3.6.2            |
| MMS-IA-79   | 'Ca. Planktophila versatilis' | TruSeq PCR-free | v2, 500 cycle  | t, p, k         | SPAdes-3.7.0            |
| MMS-IA-105  | 'Ca. Planktophila versatilis' | TruSeq PCR-free | v2, 300 cycle  | t, p, k         | a5_miseq_linux_20140604 |
| MMS-IIB-142 | 'Ca. Planktophila versatilis' | TruSeq PCR-free | v2, 500 cycle  | t, p, k         | a5_miseq_linux_20150522 |
| MMS-IIB-106 | 'Ca. Planktophila lacus'      | TruSeq PCR-free | v2, 500 cycle  | t, p, k         | SPAdes-3.6.2            |
| MMS-IIB-60  | 'Ca. Planktophila lacus'      | TruSeq PCR-free | v2, 500 cycle  | t, p, k         | SPAdes-3.6.2            |
| MMS-21-148  | 'Ca. Planktophila lacus'      | TruSeq PCR-free | v2, 500 cycle  | -               | SPAdes-3.7.0            |
| MMS-VB-114  | 'Ca. Planktophila limnetica'  | TruSeq PCR-free | v2, 500 cycle  | t, p            | SPAdes-3.7.0            |
| MMS-IIA-15  | 'Ca. Planktophila vernalis'   | TruSeq PCR-free | v2, 500 cycle  | t, p, k         | SPAdes-3.6.2            |
| MMS-21-122  | 'Ca. Nanopelagicus limnes'    | TruSeq PCR-free | v2, 500 cycle  | -               | SPAdes-3.7.0            |
| MMS-21-160  | 'Ca. Nanopelagicus hibericus' | TruSeq PCR-free | v2, 500 cycle  | -               | a5_miseq_linux_20150522 |
| MMS-IIB-91  | 'Ca. Nanopelagicus abundans'  | TruSeq PCR-free | v2, 300 cycle  | t, p, k         | a5_miseq_linux_20140604 |

\***t**: trimmomatic-0.32.jar (MMS-IA-105, MMS-IA-105), trimmomatic-0.35.jar (others), **parameters**: PE ILLUMINACLIP:TruSeq3-PE-2.fa:2:30:10; **p**: prinseq-lite-0.20.4, **parameters**: -out\_format 3 -range\_len 60-160 / 60-260 (MMS-IA-105, MMS-IA-105 / others) -range\_gc 30-80 -min\_qual\_mean 20 -ns\_max\_n 2 -derep 14 -derep\_min 2 -noniupac -trim\_qual\_right 18 -trim\_qual\_left 18 -lc\_method entropy -lc\_threshold 15 -trim\_tail\_left 3 -trim\_tail\_right 3 -trim\_right 1; **k**: kmernorm-1.0.5, **parameters**: -k 16 -c 2 -t 30.

The REPLI-g single cell kit (Qiagen, Venlo, Netherlands) was used for multiple displacement amplification (MDA). All pre-amplification steps were performed in a particle free environment dedicated to MDA. Fresh PCR-clean pipet tips were used for each MDA session and reaction tubes and PCR plates were UV-treated before usage. MDA was conducted according to the manufacturer's protocol with the following modifications: Reaction volumes were reduced to 12.5 µl and lysates for 6 to 8 replicate MDA reactions were produced in a 0.5 ml reaction tube (8 µl sample containing 2000 to 20000 cells, 6 µl each of the reagents D2 and stop) and subsequently distributed among wells of 96 well plates each containing 10 µl MDA reaction mix and SYBR I green (0.2x final concentration). Each MDA-reaction contained 2'000 - 20'000 cells.

**Table S3:** Details of the sequenced strains of planktonic 'Ca. Nanopelagicales'.

| taxonomy                       | strain      | isolation date | genome size (Mbp) | GC content (%) | # CDS | # tRNA | spacer length (bp) | coding density (%) | # $\sigma$ factors |
|--------------------------------|-------------|----------------|-------------------|----------------|-------|--------|--------------------|--------------------|--------------------|
| 'Ca. Planktophilia dulcis'     | MMS-IIA-65  | 23.05.2013     | 1.35              | 48.0           | 1344  | 40     | 12                 | 95.7               | 3                  |
| 'Ca. Planktophilia dulcis'     | MMS-IA-53   | 22.05.2013     | 1.37              | 48.0           | 1356  | 40     | 12                 | 95.7               | 3                  |
| 'Ca. Planktophilia dulcis'     | MMS-21-155  | 25.05.2012     | 1.36              | 47.9           | 1361  | 40     | 11                 | 95.7               | 3                  |
| 'Ca. Planktophilia sulfonica'  | MMS-IA-56   | 22.05.2013     | 1.34              | 48.6           | 1336  | 37     | 12                 | 96.0               | 4                  |
| 'Ca. Planktophilia versatilis' | MMS-IIB-76  | 23.05.2013     | 1.33              | 48.2           | 1318  | 40     | 14                 | 95.3               | 4                  |
| 'Ca. Planktophilia versatilis' | MMS-IA-79   | 22.05.2013     | 1.33              | 48.3           | 1327  | 38     | 14                 | 95.2               | 4                  |
| 'Ca. Planktophilia versatilis' | MMS-IA-105  | 22.05.2013     | 1.33              | 48.2           | 1329  | 40     | 14                 | 95.4               | 4                  |
| 'Ca. Planktophilia versatilis' | MMS-IIB-142 | 23.05.2013     | 1.27              | 48.3           | 1258  | 39     | 14                 | 95.5               | 4                  |
| 'Ca. Planktophilia lacus'      | MMS-IIB-106 | 23.05.2013     | 1.38              | 47.8           | 1368  | 40     | 15                 | 95.6               | 4                  |
| 'Ca. Planktophilia lacus'      | MMS-IIB-60  | 23.05.2013     | 1.41              | 47.8           | 1389  | 40     | 16                 | 95.5               | 5                  |
| 'Ca. Planktophilia lacus'      | MMS-21-148  | 25.05.2012     | 1.46              | 47.5           | 1438  | 41     | 15                 | 95.3               | 4                  |
| 'Ca. Planktophilia limnetica'  | MMS-VB-114  | 15.07.2013     | 1.33              | 45.0           | 1333  | 41     | 10                 | 96.0               | 4                  |
| 'Ca. Planktophilia vernalis'   | MMS-IIA-15  | 23.05.2013     | 1.36              | 45.7           | 1355  | 39     | 10                 | 95.7               | 4                  |
| 'Ca. Nanopelagicus limnes'     | MMS-21-122  | 25.05.2012     | 1.24              | 41.5           | 1216  | 38     | 11                 | 95.7               | 3                  |
| 'Ca. Nanopelagicus hibericus'  | MMS-21-160  | 25.05.2012     | 1.22              | 42.4           | 1211  | 38     | 13                 | 95.4               | 4                  |
| 'Ca. Nanopelagicus abundans'   | MMS-IIB-91  | 23.05.2013     | 1.16              | 40.2           | 1150  | 39     | 14                 | 95.3               | 2                  |

**Table S4:** Cell sizes of different strains and *in-situ* in Lake Zurich. Asterisks indicate values based on <10 measured cells and should be treated with caution.

| <b>strain</b> | <b>length<br/>(<math>\mu\text{m}</math>)</b> | <b>s.d.</b> | <b>width<br/>(<math>\mu\text{m}</math>)</b> | <b>s.d.</b> | <b>volume<br/>(<math>\mu\text{m}^3</math>)</b> | <b>s.d.</b> | <b>CC (fg<br/>C cell<sup>-1</sup>)</b> | <b>s.d.</b> | <b>n</b> |
|---------------|----------------------------------------------|-------------|---------------------------------------------|-------------|------------------------------------------------|-------------|----------------------------------------|-------------|----------|
| MMS-IIA-65    | 0.44                                         | ±0.09       | 0.26                                        | ±0.03       | 0.019                                          | ±0.007      | 7.1                                    | ±2.3        | 71       |
| MMS-IA-53     | 0.44                                         | ±0.14       | 0.28                                        | ±0.04       | 0.023                                          | ±0.012      | 8.5                                    | ±3.7        | 35       |
| MMS-21-155    | 0.43                                         | ±0.12       | 0.25                                        | ±0.02       | 0.018                                          | ±0.007      | 6.8                                    | ±2.4        | 77       |
| MMS-IA-56     | 0.50                                         | ±0.14       | 0.28                                        | ±0.06       | 0.026                                          | ±0.021      | 9.3                                    | ±6.4        | 23       |
| MMS-IIB-76    | 0.49                                         | ±0.12       | 0.25                                        | ±0.03       | 0.021                                          | ±0.009      | 7.6                                    | ±2.8        | 18       |
| MMS-IA-79     | 0.45                                         | ±0.10       | 0.27                                        | ±0.04       | 0.022                                          | ±0.010      | 8.1                                    | ±3.1        | 51       |
| MMS-IA-105    | 0.47                                         | ±0.15       | 0.29                                        | ±0.05       | 0.027                                          | ±0.014      | 9.6                                    | ±4.4        | 64       |
| MMS-IIB-142   | 0.50                                         | ±0.47       | 0.28                                        | ±0.29       | 0.026                                          | ±0.024      | 9.3                                    | ±8.8        | 23       |
| MMS-IIB-106*  | 0.50                                         | ±0.14       | 0.30                                        | ±0.04       | 0.029                                          | ±0.015      | 10.3                                   | ±4.5        | 10       |
| MMS-IIB-60    | 0.47                                         | ±0.08       | 0.30                                        | ±0.07       | 0.028                                          | ±0.013      | 10.0                                   | ±4.0        | 18       |
| MMS-21-148    | 0.41                                         | ±0.10       | 0.30                                        | ±0.06       | 0.025                                          | ±0.014      | 8.8                                    | ±4.4        | 128      |
| MMS-VB-114    | 0.38                                         | ±0.10       | 0.25                                        | ±0.06       | 0.016                                          | ±0.009      | 6.0                                    | ±3.0        | 52       |
| MMS-IIA-15    | 0.43                                         | ±0.12       | 0.26                                        | ±0.05       | 0.020                                          | ±0.012      | 7.3                                    | ±3.9        | 52       |
| MMS-21-122    | 0.45                                         | ±0.09       | 0.25                                        | ±0.03       | 0.018                                          | ±0.009      | 6.9                                    | ±2.9        | 85       |
| MMS-21-160    | 0.33                                         | ±0.07       | 0.24                                        | ±0.03       | 0.012                                          | ±0.005      | 4.8                                    | ±1.7        | 49       |
| MMS-IIB-91*   | 0.46                                         | ±0.47       | 0.26                                        | ±0.26       | 0.020                                          | ±0.020      | 7.5                                    | ±7.4        | 5        |

  

| <b>probe (sampling date)</b> | <b>length<br/>(<math>\mu\text{m}</math>)</b> | <b>s.d.</b> | <b>width<br/>(<math>\mu\text{m}</math>)</b> | <b>s.d.</b> | <b>volume<br/>(<math>\mu\text{m}^3</math>)</b> | <b>s.d.</b> | <b>CC (fg<br/>C cell<sup>-1</sup>)</b> | <b>s.d.</b> | <b>n</b> |
|------------------------------|----------------------------------------------|-------------|---------------------------------------------|-------------|------------------------------------------------|-------------|----------------------------------------|-------------|----------|
| Npel-2669<br>(18/07/2012)    | 0.35                                         | ±0.09       | 0.25                                        | ±0.04       | 0.014                                          | ±0.008      | 5.4                                    | ±2.6        | 97       |
| Pver-1420<br>(18/07/2012)    | 0.37                                         | ±0.12       | 0.24                                        | ±0.04       | 0.015                                          | ±0.011      | 5.7                                    | ±3.4        | 91       |
| Pver-1420<br>(15/05/2013)    | 0.35                                         | ±0.09       | 0.23                                        | ±0.03       | 0.012                                          | ±0.005      | 4.8                                    | ±1.8        | 87       |

s.d., standard deviation; CC, carbon content; n, number of cells measured

**Table S5:** Cell sizes and genomic details of genome-streamlined microbes.

| organism                           | habitat | cell volume ( $\mu\text{m}^3$ ) | source   | genome size (Mbp) | GC (%)    | coding density (%) | rho. ref.     |
|------------------------------------|---------|---------------------------------|----------|-------------------|-----------|--------------------|---------------|
| 'Ca. Nanopelagicus'                | fw      | 0.012-0.020                     | cultures | 1.16-1.24         | 40.2-42.4 | 95.3-95.7          | x this study  |
| 'Ca. Planktophila'                 | fw      | 0.016-0.029                     | cultures | 1.27-1.46         | 45.0-48.6 | 95.2-96.0          | x this study  |
| 'Ca. Nanopelagicales'              | fw      | N.A.                            | SAGs     | 1.10-1.66         | 41.4-47.6 | 95.8-96.3          | x 1, 2        |
| 'Ca. Nanopelagicus'                | fw      | N.A.                            | MAGs     | 1.38-2.2          | 40.4-42.1 | 96.1-96.4          | x 3           |
| 'Ca. Actinomarina minuta'          | mar     | 0.013                           | MAG      | 0.8-1.03          | 33.4      |                    | x 4           |
| 'Ca. Pelagibacter' (SAR11)         | mar     | 0.025-0.045                     | cultures | 1.24-1.48         | 28.6-32.3 | 93.6-97            | x 5, 6, 7     |
| LD12                               | fw      | 0.017                           | SAGs     | 1.03-1.39         | 29-30     | 95.5-96.5          | x 8, 9        |
| 'Ca. Methylopusillus planktonicus' | fw      | 0.030-0.075                     | cultures | 1.28-1.35         | 37.0-37.3 | 94.9-95.3          | x 10, unpubl. |
| OM43                               | mar     | 0.023                           | cultures | 1.30-1.37         | 35.4-37.9 | 95.0-96.7          | x 11          |
| <i>Rhodoluna ladicola</i>          | fw      | 0.053                           | cultures | 1.43              | 51.5      | 93.7               | x 12          |
| 'Ca. Aquiluna sp.'                 | fw      | N.A.                            | cultures | 1.36              | 51.7      | 93.5               | x 13          |

fw, freshwater; mar, marine; rho., rhodopsins; ref., references; N.A., data not available

#### References:

- [1] Ghylis TW, Garcia SL, Moya F, Oyserman BO, et al. (2014) Comparative single-cell genomics reveals potential ecological niches for the freshwater actinobacteria lineage. *ISME Journal* **8**:2503-2516
- [2] Garcia SL, McMahon KD, Martinez-Garcia M, Srivastava A, et al. (2013) Metabolic potential of a single cell belonging to one of the most abundant lineages in freshwater bacterioplankton. *ISME Journal* **7**:137-147
- [3] Ghai R, Mizuno CM, Picazo A, Camacho A, Rodriguez-Valera F (2014) Key roles for freshwater Actinobacteria revealed by deep metagenomic sequencing. *Molecular Ecology* **23**:6073-6090
- [4] Ghai R, Mizuno CM, Picazo A, Camacho A, Rodriguez-Valera F (2013) Metagenomics uncovers a new group of low GC and ultra-small marine Actinobacteria. *Scientific Reports* **3**
- [5] Nicastrò D, Schwartz C, Pierson J, Cho J-C, et al. (2006) Three-dimensional structure of the tiny bacterium *Pelagibacter ubique* studied by cryo-electron tomography. *Microscopy and Microanalysis* **12**:180-181
- [6] Zhao X, Schwartz C, Pierson J, Giovannoni SJ, et al. (2016) Three-dimensional structure of the ultra-oligotrophic marine bacterium *Pelagibacter*. *Applied and Environmental Microbiology*
- [7] Grote J, Thrash JC, Huggett MJ, Landry ZC, et al. (2012) Streamlining and core genome conservation among highly divergent members of the SAR11 clade. *mBio* **3**
- [8] Salcher MM, Pernthaler J, Posch T (2011) Seasonal bloom dynamics and ecophysiology of the freshwater sister clade of SAR11 bacteria 'that rule the waves' (LD12). *ISME Journal* **5**:1242-1252
- [9] Eiler A, Mondav R, Sinclair L, Fernandez-Vidal L, et al. (2016) Tuning fresh: radiation through rewiring of central metabolism in streamlined bacteria. *ISME Journal* **10**:1902-1914
- [10] Salcher MM, Neuenschwander SM, Posch T, Pernthaler J (2015) The ecology of pelagic freshwater methylotrophs assessed by a high-resolution monitoring and isolation campaign. *ISME Journal* **9**:2442-2453
- [11] Jimenez-Infante F, Ngugi DK, Vinu M, Alam I, et al. (2016) Comprehensive genomic analyses of the OM43 clade, including a novel species from the Red Sea, indicate ecotype differentiation among marine methylotrophs. *Applied and Environmental Microbiology* **82**:1215-1226
- [12] Hahn MW, Schmidt J, Taipale SJ, Doolittle WF, Koll U (2014) *Rhodoluna ladicola* gen. nov., sp. nov., a planktonic freshwater bacterium with stream-lined genome. *International Journal of Systematic and Evolutionary Microbiology* **64**:3254-3263
- [13] Kang I, Lee K, Yang S-J, Choi A, et al. (2012) Genome sequence of "*Candidatus Aquiluna*" sp. strain IMCC13023, a marine member of the Actinobacteria isolated from an Arctic fjord. *Journal of Bacteriology* **194**:3550-3551

**Table S6:** Details of the applied oligonucleotide probes

| probe                      | specificity                          | sequence (5' to 3')                         | target (rRNA, 5' position) | FA% |
|----------------------------|--------------------------------------|---------------------------------------------|----------------------------|-----|
| <b>Npel-23S-2669</b>       | 'Ca. Nanopelagicus' (acl-B1)         | ACA AGA GGT TCG TCC GTC C                   | 23S, 2669                  | 60  |
| Npel-C1                    | competitor 1 for Npel-23S-2669       | AC <u>Y</u> AGA GGT TCG TCC GTC C           |                            |     |
| Npel-C2                    | competitor 2 for Npel-23S-2669       | ACA AGA GGT TCG TCC <u>A</u> TC C           |                            |     |
| Npel-C3                    | competitor 3 for Npel-23S-2669       | AC <u>Y</u> AGA GGT TCG TCC <u>A</u> TC C   |                            |     |
| Npel-H1                    | helper 1 for Npel-23S-2669           | CGG TCC TCT CGT ACT AGG GAC AGC             |                            |     |
| Npel-H2                    | helper 2 for Npel-23S-2669           | GTG CTY CTG GCG RAA CAA CCG ACA C           |                            |     |
| Npel-H3                    | helper 3 for Npel-23S-2669           | CYT TCC RAA CGT TGC WAA TCG GCC             |                            |     |
| <b>Pver-23S-1420</b>       | 'Ca. Planktophila vernalis' (acl-A7) | AAC TAC TAC CAC ACC GGT TCG                 | 23S, 1420                  | 55  |
| Pver-C1                    | competitor 1 for Pver-23S-1420       | AAC TAC TAC CAC ACC GGT TCA <u>A</u>        |                            |     |
| Pver-C2                    | competitor 2 for Pver-23S-1420       | AAC TAC TAC CAC ACC GGG <u>T</u> CG         |                            |     |
| Pver-C3                    | competitor 3 for Pver-23S-1420       | AAC TAC TAC <u>A</u> AC ACC GGT TCG         |                            |     |
| Pver-C4                    | competitor 4 for Pver-23S-1420       | AAC TAC TAC <u>A</u> AC ACC GGG <u>T</u> CA |                            |     |
| Pver-H1                    | helper 1 for Pver-23S-1420           | CAT TAG TGG RTT CGT YAT GGG CGA ATT A       |                            |     |
| Pver-H2                    | helper 2 for Pver-23S-1420           | AGC CAT CCA CCC ACG CRG CTT                 |                            |     |
| Pver-H3                    | helper 3 for Pver-23S-1420           | CTG TGT CAC ACC ATT GCT T                   |                            |     |
| <b>Acl-852<sup>1</sup></b> | 'Ca. Nanopelagicales' (acl lineage)  | AAT GCG TTA GCT GCG TCG CA                  | 16S, 852                   | 55  |
| Acl-852-H1 <sup>1</sup>    | Helper for Acl-852                   | AAA CCG TGG AAG GTY CSC ACA ACT AG          |                            |     |
| Acl-852-H2 <sup>1</sup>    | Helper for Acl-852                   | TCC CCA GGC GGG GCR CTT                     |                            |     |

Abbreviation: FA%, formamide concentration required for the CARD-FISH hybridization buffer.

#### Reference:

- [1] Warnecke F, Sommaruga R, Sekar R, Hofer JS, Pernthaler J (2005). Abundances, identity, and growth state of *Actinobacteria* in mountain lakes of different UV transparency. *Appl Environ Microbiol* **71**: 5551-5559
